# Supplementary material for: Double-boron heterocyclic carbenes: a computational study of Diels–Alder reactions
Source: Royal Society of Chemistry journal article supplement (doi:10.1039/d4cp03615h), 2024-01-01
Supplement: d4cp03615h1.pdf [file d4cp03615h1.pdf]

**Cartesian coordinates, electronic energy (E, in a.u.) and the smallest vibrational frequency ( $\nu$ , in  $\text{cm}^{-1}$ ) for all the stable molecules calculated by M06-2X/6-311++G\*\* method**

**A1**

E= -126.977969555 a.u.

$\nu$ = 333.8675

|   |          |           |           |
|---|----------|-----------|-----------|
| B | 0.000000 | 0.000000  | 1.275959  |
| C | 0.000000 | 0.742229  | 0.000000  |
| C | 0.000000 | -0.742229 | 0.000000  |
| B | 0.000000 | 0.000000  | -1.275959 |
| H | 0.000000 | 0.000000  | 2.447650  |
| H | 0.000000 | 0.000000  | -2.447650 |

**A2**

E= -205.627134943 a.u.

$\nu$ = 38.6426

|   |           |           |           |
|---|-----------|-----------|-----------|
| B | 0.000000  | 1.281955  | 0.000000  |
| C | 0.000000  | 0.000000  | 0.741541  |
| C | 0.000000  | 0.000000  | -0.741541 |
| B | 0.000000  | -1.281955 | 0.000000  |
| C | 0.030605  | 2.824369  | 0.000000  |
| H | -0.432612 | 3.247603  | 0.891913  |
| H | 1.079102  | 3.143331  | 0.000000  |
| H | -0.432612 | 3.247603  | -0.891913 |
| C | -0.030605 | -2.824369 | 0.000000  |
| H | -1.079102 | -3.143331 | 0.000000  |
| H | 0.432612  | -3.247603 | -0.891913 |
| H | 0.432612  | -3.247603 | 0.891913  |

**A3**

E= -708.322958076 a.u.

$\nu$ = 37.6349

|    |           |           |           |
|----|-----------|-----------|-----------|
| B  | 1.288577  | 0.011162  | -0.015677 |
| C  | -0.000008 | 0.746724  | -0.000053 |
| C  | 0.000010  | -0.725494 | -0.000058 |
| B  | -1.288575 | 0.011125  | 0.015575  |
| H  | 3.827355  | 1.259381  | -0.540027 |
| H  | 3.716592  | -0.162473 | 1.406937  |
| H  | 3.791867  | -1.144073 | -0.795661 |
| H  | -3.716753 | -0.165250 | -1.406517 |
| H  | -3.791741 | -1.142530 | 0.798002  |
| H  | -3.827337 | 1.260416  | 0.537684  |
| Si | 3.282003  | -0.005159 | -0.000927 |
| Si | -3.282003 | -0.005147 | 0.000981  |

**A4**

E= -237.801824835 a.u.

$\nu$ = 133.5090

|   |          |           |           |
|---|----------|-----------|-----------|
| B | 0.000000 | 0.000000  | 1.281132  |
| C | 0.000000 | 0.737553  | 0.000000  |
| C | 0.000000 | -0.737553 | 0.000000  |
| B | 0.000000 | 0.000000  | -1.281132 |
| N | 0.000000 | 0.000000  | 2.666860  |
| H | 0.000000 | -0.848336 | 3.208604  |
| H | 0.000000 | 0.848336  | 3.208604  |
| N | 0.000000 | 0.000000  | -2.666860 |
| H | 0.000000 | -0.848336 | -3.208604 |
| H | 0.000000 | 0.848336  | -3.208604 |

**A5**

E= -810.877128753 a.u.

$\nu$ = 82.2559

|   |           |           |           |
|---|-----------|-----------|-----------|
| B | -1.283341 | 0.000227  | -0.029371 |
| C | 0.000046  | 0.735871  | -0.000030 |
| C | -0.000043 | -0.735642 | -0.000007 |
| B | 1.283348  | 0.000058  | 0.029333  |
| H | -3.397983 | 1.056137  | -0.787967 |
| H | -3.397513 | -1.056273 | -0.788161 |
| H | 3.397693  | -1.056311 | 0.788061  |
| H | 3.397836  | 1.056134  | 0.788060  |
| P | 3.157247  | -0.000070 | -0.117042 |
| P | -3.157252 | -0.000095 | 0.117070  |

**A6**

E= -277.554407665 a.u.

v= 139.3394

|   |           |           |          |
|---|-----------|-----------|----------|
| B | 0.008100  | 1.270656  | 0.000000 |
| C | 0.746691  | -0.007450 | 0.000000 |
| C | -0.746691 | 0.007450  | 0.000000 |
| B | -0.008100 | -1.270656 | 0.000000 |
| O | -0.008100 | 2.608276  | 0.000000 |
| H | 0.868233  | 3.002147  | 0.000000 |
| O | 0.008100  | -2.608276 | 0.000000 |
| H | -0.868233 | -3.002147 | 0.000000 |

**A7**

E= -923.432211191 a.u.

v= 78.6553

|   |           |           |          |
|---|-----------|-----------|----------|
| B | -0.017301 | 1.277049  | 0.000000 |
| C | -0.736438 | -0.010202 | 0.000000 |
| C | 0.736438  | 0.010202  | 0.000000 |
| B | 0.017301  | -1.277049 | 0.000000 |
| S | 0.017301  | 3.044795  | 0.000000 |
| H | -1.317975 | 3.197748  | 0.000000 |
| S | -0.017301 | -3.044795 | 0.000000 |
| H | 1.317975  | -3.197748 | 0.000000 |

**A8**

E= -923.432211191 a.u.

v= 78.6553

|   |          |           |           |
|---|----------|-----------|-----------|
| B | 0.000000 | 0.000000  | 1.257527  |
| C | 0.000000 | 0.754220  | 0.000000  |
| C | 0.000000 | -0.754220 | 0.000000  |
| B | 0.000000 | 0.000000  | -1.257527 |
| F | 0.000000 | 0.000000  | -2.560667 |
| F | 0.000000 | 0.000000  | 2.560667  |

**A9**

E= -1046.27672083 a.u.

v= 87.7410

|    |          |           |           |
|----|----------|-----------|-----------|
| B  | 0.000000 | 0.000000  | 1.265908  |
| C  | 0.000000 | 0.746004  | 0.000000  |
| C  | 0.000000 | -0.746004 | 0.000000  |
| B  | 0.000000 | 0.000000  | -1.265908 |
| Cl | 0.000000 | 0.000000  | -2.977329 |
| Cl | 0.000000 | 0.000000  | 2.977329  |

**A10**

E= -5274.21137871 a.u.

v= 76.5304

|    |          |           |           |
|----|----------|-----------|-----------|
| B  | 0.000000 | 0.000000  | 1.267495  |
| C  | 0.000000 | 0.744877  | 0.000000  |
| C  | 0.000000 | -0.744877 | 0.000000  |
| B  | 0.000000 | 0.000000  | -1.267495 |
| Br | 0.000000 | 0.000000  | 3.133719  |
| Br | 0.000000 | 0.000000  | -3.133719 |

**A11**

E= -589.044304471 a.u.

v= 35.4980

|   |          |           |           |
|---|----------|-----------|-----------|
| B | 0.000000 | 0.000000  | 1.279871  |
| C | 0.000000 | 0.741463  | 0.000000  |
| C | 0.000000 | -0.741463 | 0.000000  |
| B | 0.000000 | 0.000000  | -1.279871 |
| C | 0.000000 | 0.000000  | -2.806478 |
| C | 0.000000 | 1.206784  | -3.520701 |
| C | 0.000000 | -1.206784 | -3.520701 |
| C | 0.000000 | 1.208345  | -4.909774 |
| H | 0.000000 | 2.144867  | -2.975444 |
| C | 0.000000 | -1.208345 | -4.909774 |
| H | 0.000000 | -2.144867 | -2.975444 |
| C | 0.000000 | 0.000000  | -5.602168 |
| H | 0.000000 | 2.145659  | -5.454433 |
| H | 0.000000 | -2.145659 | -5.454433 |
| H | 0.000000 | 0.000000  | -6.686767 |
| C | 0.000000 | 0.000000  | 2.806478  |
| C | 0.000000 | -1.206784 | 3.520701  |
| C | 0.000000 | 1.206784  | 3.520701  |

|   |          |           |          |
|---|----------|-----------|----------|
| C | 0.000000 | -1.208345 | 4.909774 |
| H | 0.000000 | -2.144867 | 2.975444 |
| C | 0.000000 | 1.208345  | 4.909774 |
| H | 0.000000 | 2.144867  | 2.975444 |
| C | 0.000000 | 0.000000  | 5.602168 |
| H | 0.000000 | -2.145659 | 5.454433 |
| H | 0.000000 | 2.145659  | 5.454433 |
| H | 0.000000 | 0.000000  | 6.686767 |

**A12**

E= -441.441726950 a.u.

$\nu$ = 12.1981

|   |           |           |           |
|---|-----------|-----------|-----------|
| B | 0.217018  | 1.263666  | 0.000000  |
| C | 0.000000  | 0.000000  | 0.742153  |
| C | 0.000000  | 0.000000  | -0.742153 |
| B | -0.217018 | -1.263666 | 0.000000  |
| C | -0.546598 | -2.781131 | 0.000000  |
| C | 0.546598  | 2.781131  | 0.000000  |
| C | 0.000000  | -3.467038 | 1.259974  |
| H | -0.382432 | -2.991351 | 2.165959  |
| H | -0.296838 | -4.521118 | 1.272373  |
| H | 1.091821  | -3.426030 | 1.294457  |
| C | 0.000000  | -3.467038 | -1.259974 |
| H | -0.296838 | -4.521118 | -1.272373 |
| H | -0.382432 | -2.991351 | -2.165959 |
| H | 1.091821  | -3.426030 | -1.294457 |
| C | -2.088678 | -2.872285 | 0.000000  |
| H | -2.519685 | -2.399680 | -0.886518 |
| H | -2.386807 | -3.926009 | 0.000000  |
| H | -2.519685 | -2.399680 | 0.886518  |
| C | 2.088678  | 2.872285  | 0.000000  |
| H | 2.519685  | 2.399680  | -0.886518 |
| H | 2.386807  | 3.926009  | 0.000000  |
| H | 2.519685  | 2.399680  | 0.886518  |
| C | 0.000000  | 3.467038  | -1.259974 |
| H | -1.091821 | 3.426030  | -1.294457 |
| H | 0.296838  | 4.521118  | -1.272373 |
| H | 0.382432  | 2.991351  | -2.165959 |
| C | 0.000000  | 3.467038  | 1.259974  |
| H | -1.091821 | 3.426030  | 1.294457  |
| H | 0.382432  | 2.991351  | 2.165959  |
| H | 0.296838  | 4.521118  | 1.272373  |

**A13**

E= -311.477557358 a.u.

$\nu$ = 69.9530

|   |          |           |           |
|---|----------|-----------|-----------|
| B | 0.000000 | 0.000000  | 1.266882  |
| C | 0.000000 | 0.743778  | 0.000000  |
| C | 0.000000 | -0.743778 | 0.000000  |
| B | 0.000000 | 0.000000  | -1.266882 |
| C | 0.000000 | 0.000000  | -2.775366 |
| C | 0.000000 | 0.000000  | 2.775366  |
| N | 0.000000 | 0.000000  | -3.925100 |
| N | 0.000000 | 0.000000  | 3.925100  |

**A14**

E= -535.970296575 a.u.

$\nu$ = 40.2039

|   |           |           |           |
|---|-----------|-----------|-----------|
| B | -1.253900 | 0.000000  | 0.000000  |
| C | 0.000000  | 0.000000  | 0.747536  |
| C | 0.000000  | 0.000000  | -0.747536 |
| B | 1.253900  | 0.000000  | 0.000000  |
| N | -2.753711 | 0.000000  | 0.000000  |
| N | 2.753711  | 0.000000  | 0.000000  |
| O | -3.295337 | 1.084208  | 0.000000  |
| O | -3.295337 | -1.084208 | 0.000000  |
| O | 3.295337  | 1.084208  | 0.000000  |
| O | 3.295337  | -1.084208 | 0.000000  |

**B1**

E= -332.600256467 a.u.

$\nu$ = 158.6112

|   |           |           |           |
|---|-----------|-----------|-----------|
| C | 0.390615  | 1.183706  | 0.051198  |
| C | 1.644762  | 0.743350  | -0.066425 |
| C | 1.644761  | -0.743350 | -0.066424 |
| C | 0.390614  | -1.183706 | 0.051199  |
| H | 0.044697  | 2.207453  | 0.091202  |
| H | 2.534817  | 1.352972  | -0.146628 |
| H | 2.534817  | -1.352972 | -0.146627 |
| H | 0.044696  | -2.207452 | 0.091203  |
| C | -0.554987 | 0.000000  | 0.065105  |
| C | -1.495894 | 0.000000  | -1.131459 |
| H | -2.130029 | -0.887877 | -1.102151 |
| H | -2.130027 | 0.887878  | -1.102152 |
| H | -0.921392 | -0.000002 | -2.059263 |
| F | -1.344090 | 0.000000  | 1.217250  |

**B2**

E= -2866.86356600 a.u.

v= 135.3068

|    |           |           |           |
|----|-----------|-----------|-----------|
| C  | 0.651449  | 0.918304  | 1.191724  |
| C  | 0.651449  | 2.174341  | 0.744388  |
| C  | 0.651449  | 2.174341  | -0.744388 |
| C  | 0.651449  | 0.918304  | -1.191724 |
| H  | 0.652034  | 0.551670  | 2.207067  |
| H  | 0.646908  | 3.068308  | 1.352530  |
| H  | 0.646908  | 3.068308  | -1.352530 |
| H  | 0.652034  | 0.551670  | -2.207067 |
| C  | 0.626766  | -0.003811 | 0.000000  |
| Br | -1.051422 | -1.033402 | 0.000000  |
| F  | 1.645167  | -0.906640 | 0.000000  |

**B3**

E= -752.891309909 a.u.

v= 149.8621

|    |           |           |           |
|----|-----------|-----------|-----------|
| C  | 0.280623  | 0.593617  | 1.192371  |
| C  | 0.280623  | 1.848413  | 0.745436  |
| C  | 0.280623  | 1.848413  | -0.745436 |
| C  | 0.280623  | 0.593617  | -1.192371 |
| H  | 0.278764  | 0.226488  | 2.207744  |
| H  | 0.277052  | 2.742868  | 1.352887  |
| H  | 0.277052  | 2.742868  | -1.352887 |
| H  | 0.278764  | 0.226488  | -2.207744 |
| C  | 0.260217  | -0.333487 | 0.000000  |
| Cl | -1.245486 | -1.316202 | 0.000000  |
| F  | 1.307263  | -1.207412 | 0.000000  |

**B4**

E= -692.963870439 a.u.

v= 143.8019

|    |           |           |           |
|----|-----------|-----------|-----------|
| C  | 0.661396  | 0.022137  | 1.179989  |
| C  | 1.878958  | -0.310516 | 0.740328  |
| C  | 1.878958  | -0.310517 | -0.740328 |
| C  | 0.661396  | 0.022136  | -1.179989 |
| H  | 0.318368  | 0.106582  | 2.201635  |
| H  | 2.737305  | -0.550487 | 1.353144  |
| H  | 2.737305  | -0.550489 | -1.353144 |
| H  | 0.318368  | 0.106580  | -2.201635 |
| C  | -0.232297 | 0.313865  | 0.000000  |
| C  | -0.770683 | 1.740453  | -0.000001 |
| H  | -1.380237 | 1.916610  | -0.887263 |
| H  | -1.380236 | 1.916611  | 0.887263  |
| H  | 0.071683  | 2.436566  | -0.000001 |
| Cl | -1.640525 | -0.838078 | 0.000000  |

**B5**

E= -2806.93792900 a.u.

v= 125.7222

|   |          |           |           |
|---|----------|-----------|-----------|
| C | 1.121023 | 0.011727  | 1.179204  |
| C | 2.216233 | -0.618518 | 0.739368  |
| C | 2.216233 | -0.618517 | -0.739368 |
| C | 1.121023 | 0.011728  | -1.179204 |
| H | 0.812232 | 0.182727  | 2.200839  |
| H | 2.985790 | -1.066399 | 1.353119  |
| H | 2.985791 | -1.066397 | -1.353120 |

|    |           |           |           |
|----|-----------|-----------|-----------|
| H  | 0.812232  | 0.182729  | -2.200839 |
| C  | 0.331824  | 0.512720  | 0.000000  |
| C  | 0.115566  | 2.020714  | 0.000001  |
| H  | -0.438507 | 2.329509  | -0.887008 |
| H  | -0.438507 | 2.329508  | 0.887009  |
| H  | 1.092790  | 2.511785  | 0.000001  |
| Br | -1.444092 | -0.380645 | 0.000000  |

**B6**

E= -3227.22258128 a.u.

v= 127.7476

|    |           |           |           |
|----|-----------|-----------|-----------|
| C  | 0.393110  | 1.055673  | 1.187065  |
| C  | 0.393110  | 2.314130  | 0.741172  |
| C  | 0.393110  | 2.314130  | -0.741172 |
| C  | 0.393110  | 1.055673  | -1.187065 |
| H  | 0.395302  | 0.688207  | 2.202080  |
| H  | 0.390609  | 3.204980  | 1.353772  |
| H  | 0.390609  | 3.204980  | -1.353772 |
| H  | 0.395302  | 0.688207  | -2.202080 |
| C  | 0.386979  | 0.130664  | 0.000000  |
| Br | -1.258483 | -0.937071 | 0.000000  |
| Cl | 1.806975  | -0.953558 | 0.000000  |

**B7**

E= -233.363120591 a.u.

v= 162.9159

|   |           |           |           |
|---|-----------|-----------|-----------|
| C | -0.206580 | -1.173388 | 0.190474  |
| C | -1.421106 | -0.735988 | -0.176757 |
| C | -1.421110 | 0.735983  | -0.176757 |
| C | -0.206585 | 1.173390  | 0.190470  |
| H | 0.979063  | 0.000005  | 1.524817  |
| H | 0.112786  | -2.203538 | 0.278722  |
| H | -2.272647 | -1.350549 | -0.437862 |
| H | -2.272656 | 1.350540  | -0.437858 |
| H | 0.112774  | 2.203541  | 0.278720  |
| C | 0.695567  | 0.000002  | 0.462424  |
| C | 1.972044  | 0.000001  | -0.389297 |
| H | 2.576966  | 0.884527  | -0.179801 |
| H | 2.576909  | -0.884584 | -0.179883 |
| H | 1.713422  | 0.000058  | -1.450200 |

**B8**

E= -2767.63022270 a.u.

v= 126.1447

|    |           |           |           |
|----|-----------|-----------|-----------|
| C  | 0.729890  | 0.912445  | 1.182297  |
| C  | 0.729890  | 2.175903  | 0.738782  |
| C  | 0.729890  | 2.175903  | -0.738782 |
| C  | 0.729890  | 0.912445  | -1.182297 |
| H  | 1.642965  | -0.659701 | 0.000000  |
| H  | 0.719385  | 0.564030  | 2.204459  |
| H  | 0.724667  | 3.067074  | 1.351622  |
| H  | 0.724667  | 3.067074  | -1.351622 |
| H  | 0.719385  | 0.564030  | -2.204459 |
| C  | 0.766049  | -0.010170 | 0.000000  |
| Br | -0.761278 | -1.245762 | 0.000000  |

**B9**

E= -653.655383899 a.u.

v= 142.9188

|    |           |           |           |
|----|-----------|-----------|-----------|
| C  | 0.396198  | 0.472086  | 1.183006  |
| C  | 0.396198  | 1.734394  | 0.739655  |
| C  | 0.396198  | 1.734394  | -0.739655 |
| C  | 0.396198  | 0.472086  | -1.183006 |
| H  | 1.370765  | -1.042499 | 0.000000  |
| H  | 0.383795  | 0.122666  | 2.204960  |
| H  | 0.391480  | 2.625961  | 1.352020  |
| H  | 0.391480  | 2.625961  | -1.352020 |
| H  | 0.383795  | 0.122666  | -2.204960 |
| C  | 0.449529  | -0.453829 | 0.000000  |
| Cl | -0.889838 | -1.659384 | 0.000000  |

**B10**

E= -293.290033203 a.u.

v= 189.0113

|   |           |           |           |
|---|-----------|-----------|-----------|
| C | 0.130968  | 0.129988  | 1.185925  |
| C | 0.130968  | 1.390662  | 0.741983  |
| C | 0.130968  | 1.390662  | -0.741983 |
| C | 0.130968  | 0.129988  | -1.185925 |
| H | 1.228283  | -1.265951 | 0.000000  |
| H | 0.121396  | -0.216591 | 2.209142  |
| H | 0.127687  | 2.285123  | 1.350431  |
| H | 0.127687  | 2.285123  | -1.350431 |
| H | 0.121396  | -0.216591 | -2.209142 |
| C | 0.234611  | -0.794892 | 0.000000  |
| F | -0.697482 | -1.816618 | 0.000000  |

**TS-B1-anti**

E= -658.182177952 a.u.

v= 369.0929i

|   |           |           |           |
|---|-----------|-----------|-----------|
| C | 1.363232  | -0.149373 | -0.000014 |
| C | 0.600015  | -0.728259 | -1.174212 |
| C | 0.072156  | -1.918123 | -0.708889 |
| C | 0.072174  | -1.918097 | 0.708962  |
| C | 0.600040  | -0.728212 | 1.174226  |
| H | 0.840774  | -0.493059 | -2.201631 |
| H | -0.368701 | -2.688806 | -1.326187 |
| H | -0.368667 | -2.688756 | 1.326301  |
| H | 0.840842  | -0.492984 | 2.201629  |
| C | -1.148098 | 0.666555  | -0.794604 |
| C | -1.148075 | 0.666524  | 0.794591  |
| B | -0.650928 | 1.825908  | 0.000006  |
| B | -2.071525 | -0.157025 | -0.000013 |
| C | 2.820735  | -0.623447 | -0.000019 |
| H | 3.321691  | -0.233516 | -0.886795 |
| H | 3.321709  | -0.233482 | 0.886732  |
| H | 2.870577  | -1.710451 | 0.000001  |
| F | -2.915999 | -1.161195 | -0.000018 |
| F | -0.325486 | 3.095038  | 0.000030  |
| F | 1.437147  | 1.242960  | -0.000042 |

**TS-B1-syn**

E= -658.160569506 a.u.

v= 370.7523i

|   |           |           |           |
|---|-----------|-----------|-----------|
| C | -1.427994 | -0.125810 | -0.000034 |
| C | -0.637231 | -0.712248 | 1.176199  |
| C | -0.090128 | -1.886603 | 0.711892  |
| C | -0.090141 | -1.886713 | -0.711720 |
| C | -0.637289 | -0.712451 | -1.176193 |
| H | -0.875397 | -0.483279 | 2.205793  |
| H | 0.374147  | -2.646857 | 1.325668  |
| H | 0.374132  | -2.647057 | -1.325385 |
| H | -0.875420 | -0.483599 | -2.205820 |
| C | 1.177358  | 0.648062  | 0.803552  |
| C | 1.177390  | 0.648134  | -0.803585 |
| B | 0.842874  | 1.848086  | 0.000024  |
| B | 2.055408  | -0.222174 | -0.000046 |
| C | -1.830747 | 1.342537  | -0.000189 |
| H | -1.480595 | 1.865763  | -0.890331 |
| H | -2.919108 | 1.389263  | -0.000478 |
| H | -1.481044 | 1.865825  | 0.890096  |
| F | 0.515376  | 3.117969  | 0.000090  |
| F | 2.856043  | -1.258756 | -0.000067 |
| F | -2.644245 | -0.845775 | 0.000092  |

**TS-B2-anti**

E= -3192.43818125 a.u.

v= 390.1576i

|   |           |           |           |
|---|-----------|-----------|-----------|
| C | 0.586658  | 0.199476  | 0.000276  |
| C | 0.006260  | -0.546208 | -1.180728 |
| C | -0.245640 | -1.820211 | -0.708123 |
| C | -0.245482 | -1.820403 | 0.708247  |
| C | 0.006733  | -0.546654 | 1.181142  |
| H | 0.205900  | -0.254903 | -2.201072 |
| H | -0.502208 | -2.669972 | -1.325017 |
| H | -0.501918 | -2.670348 | 1.324944  |

|    |           |           |           |
|----|-----------|-----------|-----------|
| H  | 0.206178  | -0.255427 | 2.201538  |
| C  | -2.018000 | 0.403857  | -0.797963 |
| C  | -2.018564 | 0.404073  | 0.797977  |
| B  | -1.845637 | 1.650035  | -0.000010 |
| B  | -2.723721 | -0.613743 | -0.000099 |
| Br | 2.544104  | -0.041001 | -0.000177 |
| F  | -1.775948 | 2.954649  | -0.000176 |
| F  | -3.307262 | -1.786519 | -0.000215 |
| F  | 0.412477  | 1.549718  | 0.000545  |

**TS-B2-syn**

E= -3192.42207326 a.u.

v= 401.8113i

|    |           |           |           |
|----|-----------|-----------|-----------|
| C  | -0.416091 | -1.084905 | -0.000003 |
| C  | 0.541206  | -0.983430 | 1.186278  |
| C  | 1.698158  | -1.561833 | 0.712614  |
| C  | 1.698179  | -1.561814 | -0.712574 |
| C  | 0.541239  | -0.983385 | -1.186257 |
| H  | 0.193331  | -0.963528 | 2.208249  |
| H  | 2.535614  | -1.868393 | 1.324592  |
| H  | 2.535651  | -1.868357 | -1.324537 |
| H  | 0.193391  | -0.963482 | -2.208238 |
| C  | 1.053577  | 1.204663  | 0.795619  |
| C  | 1.053566  | 1.204648  | -0.795608 |
| B  | 0.025242  | 1.938034  | 0.000012  |
| B  | 2.285758  | 1.086058  | -0.000006 |
| Br | -1.987936 | 0.049233  | -0.000002 |
| F  | 3.552812  | 0.749227  | -0.000019 |
| F  | -0.887299 | 2.879136  | 0.000009  |
| F  | -0.938205 | -2.359864 | -0.000038 |

**TS-B3-anti**

E= -1078.46566628 a.u.

v= 390.9006i

|    |           |           |           |
|----|-----------|-----------|-----------|
| C  | 1.084675  | 0.150840  | 0.000014  |
| C  | 0.469937  | -0.574839 | -1.181995 |
| C  | 0.180081  | -1.838408 | -0.709473 |
| C  | 0.180145  | -1.838389 | 0.709623  |
| C  | 0.470076  | -0.574836 | 1.182083  |
| H  | 0.679686  | -0.289724 | -2.202263 |
| H  | -0.103858 | -2.680450 | -1.325042 |
| H  | -0.103746 | -2.680415 | 1.325235  |
| H  | 0.679853  | -0.289656 | 2.202325  |
| C  | -1.522510 | 0.445377  | -0.797704 |
| C  | -1.522586 | 0.445389  | 0.797706  |
| B  | -1.302305 | 1.684192  | 0.000019  |
| B  | -2.258795 | -0.549912 | -0.000035 |
| F  | 0.943404  | 1.507239  | 0.000012  |
| F  | -1.190553 | 2.985735  | 0.000018  |
| F  | -2.870732 | -1.708102 | -0.000068 |
| Cl | 2.863270  | -0.122695 | -0.000079 |

**TS-B3-syn**

E= -1078.45392739 a.u.

v= 400.0951i

|    |           |           |           |
|----|-----------|-----------|-----------|
| C  | -0.873082 | -0.986565 | -0.000001 |
| C  | 0.089782  | -0.977122 | 1.185767  |
| C  | 1.195452  | -1.647875 | 0.712515  |
| C  | 1.195457  | -1.647885 | -0.712494 |
| C  | 0.089785  | -0.977149 | -1.185765 |
| H  | -0.257335 | -0.929649 | 2.207219  |
| H  | 2.004501  | -2.021732 | 1.324976  |
| H  | 2.004511  | -2.021750 | -1.324945 |
| H  | -0.257320 | -0.929679 | -2.207221 |
| C  | 0.767505  | 1.163146  | 0.796454  |
| C  | 0.767503  | 1.163159  | -0.796457 |
| B  | -0.218646 | 1.949757  | 0.000005  |
| B  | 1.988219  | 0.959355  | -0.000007 |
| F  | -1.520567 | -2.201049 | 0.000014  |
| F  | -1.102427 | 2.916621  | 0.000015  |
| F  | 3.228939  | 0.537022  | -0.000012 |
| Cl | -2.187655 | 0.208567  | -0.000017 |

**TS-B4-anti**

E= -1018.53282578 a.u.

v= 387.8106i

|    |           |           |           |
|----|-----------|-----------|-----------|
| C  | 0.934044  | -0.933001 | -0.000011 |
| C  | -0.020578 | -1.011428 | -1.174423 |
| C  | -1.078271 | -1.773459 | -0.707541 |
| C  | -1.078269 | -1.773382 | 0.707590  |
| C  | -0.020633 | -1.011208 | 1.174391  |
| H  | 0.312031  | -0.936752 | -2.200141 |
| H  | -1.850664 | -2.208349 | -1.326754 |
| H  | -1.850656 | -2.208217 | 1.326848  |
| H  | 0.312051  | -0.936635 | 2.200094  |
| C  | -0.820819 | 1.060682  | -0.784716 |
| C  | -0.820767 | 1.060501  | 0.784670  |
| B  | 0.208550  | 1.837514  | 0.000015  |
| B  | -2.035950 | 0.815721  | -0.000022 |
| C  | 1.903395  | -2.130997 | 0.000153  |
| H  | 2.536856  | -2.100102 | -0.886889 |
| H  | 2.536675  | -2.100005 | 0.887322  |
| H  | 1.327886  | -3.055247 | 0.000144  |
| F  | -3.261438 | 0.338786  | -0.000027 |
| F  | 0.815150  | 3.024538  | 0.000137  |
| Cl | 1.990635  | 0.534292  | -0.000133 |

**TS-B4-syn**

E= -1018.52166160 a.u.

v= 393.5701i

|    |           |           |           |
|----|-----------|-----------|-----------|
| C  | -1.123530 | 0.291594  | 0.090929  |
| C  | -0.602592 | -0.593056 | 1.204910  |
| C  | -0.309666 | -1.822032 | 0.652209  |
| C  | -0.269714 | -1.708679 | -0.754035 |
| C  | -0.470893 | -0.382389 | -1.122973 |
| H  | -0.771333 | -0.376611 | 2.250321  |
| H  | -0.058972 | -2.713994 | 1.209552  |
| H  | 0.010460  | -2.502152 | -1.433248 |
| H  | -0.674883 | -0.039394 | -2.128172 |
| C  | 1.644524  | 0.349487  | 0.813439  |
| C  | 1.513398  | 0.268114  | -0.797165 |
| B  | 1.610998  | 1.551749  | -0.045093 |
| B  | 2.211831  | -0.752019 | 0.020909  |
| C  | -1.099202 | 1.804628  | 0.277158  |
| H  | -0.965246 | 2.315160  | -0.678098 |
| H  | -2.041427 | 2.139961  | 0.705839  |
| H  | -0.321237 | 2.108906  | 0.974284  |
| F  | 1.651853  | 2.860531  | -0.132830 |
| F  | 2.739874  | -1.951797 | 0.024818  |
| Cl | -2.912412 | -0.138538 | -0.117311 |

**TS-B5-anti**

E= -3132.50153410 a.u.

v= 398.4750i

|    |           |           |           |
|----|-----------|-----------|-----------|
| C  | 0.384573  | 1.153949  | -0.000010 |
| C  | -0.563628 | 1.015255  | 1.174036  |
| C  | -1.758061 | 1.541880  | 0.707028  |
| C  | -1.758084 | 1.541794  | -0.707057 |
| C  | -0.563652 | 1.015058  | -1.174029 |
| H  | -0.224397 | 1.013628  | 2.200346  |
| H  | -2.604843 | 1.805699  | 1.325903  |
| H  | -2.604879 | 1.805530  | -1.325949 |
| H  | -0.224425 | 1.013443  | -2.200345 |
| C  | -0.953687 | -1.171431 | 0.785628  |
| C  | -0.953718 | -1.171315 | -0.785606 |
| B  | 0.176132  | -1.789726 | -0.000024 |
| B  | -2.193559 | -1.157631 | 0.000038  |
| C  | 1.048339  | 2.548447  | -0.000140 |
| H  | 1.671604  | 2.668181  | 0.886335  |
| H  | 1.671580  | 2.668018  | -0.886654 |
| H  | 0.271833  | 3.312388  | -0.000200 |
| F  | -3.487698 | -0.923406 | 0.000050  |
| F  | 0.959351  | -2.867447 | -0.000111 |
| Br | 1.874094  | -0.122122 | 0.000055  |



**TS-B5-syn**

E= -3132.49568503 a.u.

v= 381.9618i

|    |           |           |           |
|----|-----------|-----------|-----------|
| C  | -0.605250 | 0.366811  | -0.004505 |
| C  | -0.068362 | -0.439907 | 1.165351  |
| C  | 0.120374  | -1.735789 | 0.704818  |
| C  | 0.119675  | -1.739679 | -0.702731 |
| C  | -0.071669 | -0.447004 | -1.169958 |
| H  | -0.238585 | -0.147312 | 2.192000  |
| H  | 0.347264  | -2.588937 | 1.329160  |
| H  | 0.346122  | -2.596289 | -1.322468 |
| H  | -0.239664 | -0.159136 | -2.198278 |
| C  | 2.064369  | 0.241860  | 0.807479  |
| C  | 2.069764  | 0.244551  | -0.807149 |
| B  | 2.173571  | 1.484603  | 0.002200  |
| B  | 2.643795  | -0.850483 | -0.000089 |
| C  | -0.489223 | 1.891026  | -0.010971 |
| H  | 0.046486  | 2.232149  | -0.897878 |
| H  | -1.464801 | 2.368368  | -0.025973 |
| H  | 0.025588  | 2.241629  | 0.884669  |
| F  | 2.308642  | 2.790281  | 0.005541  |
| F  | 3.117285  | -2.072551 | -0.000045 |
| Br | -2.588019 | -0.036339 | 0.002421  |

**TS-B6-anti**

E= -3552.78570608 a.u.

v= 401.6839i

|    |           |           |           |
|----|-----------|-----------|-----------|
| C  | -0.602511 | 0.136570  | -0.000077 |
| C  | -0.023922 | -0.621943 | 1.178427  |
| C  | 0.173020  | -1.909361 | 0.706816  |
| C  | 0.173009  | -1.909807 | -0.705615 |
| C  | -0.023916 | -0.622693 | -1.178075 |
| H  | -0.210464 | -0.323104 | 2.199155  |
| H  | 0.402028  | -2.765205 | 1.326352  |
| H  | 0.401946  | -2.766067 | -1.324604 |
| H  | -0.210368 | -0.324534 | -2.199016 |
| C  | 2.067753  | 0.165192  | 0.796431  |
| C  | 2.067810  | 0.165588  | -0.796513 |
| B  | 2.080939  | 1.429525  | 0.000239  |
| B  | 2.685889  | -0.908078 | -0.000323 |
| Br | -2.561913 | -0.184182 | 0.000001  |
| F  | 2.348107  | 2.715051  | 0.000644  |
| F  | 3.167766  | -2.127690 | -0.000590 |
| Cl | -0.422391 | 1.900619  | -0.000609 |

**TS-B6-syn**

E= -3552.78080178 a.u.

v= 404.7550i

|    |           |           |           |
|----|-----------|-----------|-----------|
| C  | 0.644073  | 0.747354  | -0.000031 |
| C  | -0.274060 | 1.016595  | 1.181301  |
| C  | -1.165501 | 1.960250  | 0.708518  |
| C  | -1.165401 | 1.960401  | -0.708519 |
| C  | -0.273849 | 1.016975  | -1.181410 |
| H  | 0.052980  | 0.881695  | 2.201488  |
| H  | -1.839179 | 2.537264  | 1.326528  |
| H  | -1.838972 | 2.537594  | -1.326481 |
| H  | 0.053170  | 0.882058  | -2.201593 |
| C  | -1.478973 | -0.862341 | 0.787460  |
| C  | -1.479098 | -0.862544 | -0.787548 |
| B  | -0.689154 | -1.875913 | -0.000043 |
| B  | -2.612306 | -0.358335 | -0.000016 |
| Br | 1.554465  | -0.974414 | -0.000051 |
| F  | -3.702746 | 0.373055  | 0.000020  |
| F  | -0.354359 | -3.160339 | 0.000106  |
| Cl | 1.961401  | 1.980150  | 0.000140  |

**TS-B7-anti**

E= -558.937708954 a.u.

v= 388.9061i

|   |           |           |          |
|---|-----------|-----------|----------|
| C | -1.474399 | 0.240986  | 0.000035 |
| C | -0.801453 | -0.454849 | 1.164058 |
| C | -0.416766 | -1.709595 | 0.703778 |

|   |           |           |           |
|---|-----------|-----------|-----------|
| C | -0.416652 | -1.709471 | -0.703851 |
| C | -0.801233 | -0.454620 | -1.164004 |
| H | -1.381932 | 1.326393  | 0.000180  |
| H | -1.005084 | -0.209838 | 2.197620  |
| H | -0.061269 | -2.520467 | 1.325446  |
| H | -0.061044 | -2.520232 | -1.325601 |
| H | -1.004748 | -0.209458 | -2.197555 |
| C | 1.133230  | 0.603901  | 0.811947  |
| C | 1.133257  | 0.603947  | -0.811900 |
| B | 0.809286  | 1.796090  | 0.000049  |
| B | 1.963622  | -0.309303 | 0.000010  |
| C | -2.990431 | -0.066565 | -0.000115 |
| H | -3.458295 | 0.370529  | 0.883547  |
| H | -3.458197 | 0.370763  | -0.883714 |
| H | -3.171256 | -1.141281 | -0.000261 |
| F | 0.346372  | 3.026209  | 0.000052  |
| F | 2.714070  | -1.384293 | -0.000012 |

**TS-B7-syn**

E= -558.933215046 a.u.

$\nu$ = 369.6235i

|   |           |           |           |
|---|-----------|-----------|-----------|
| C | 0.574282  | -1.570723 | 0.000077  |
| C | -0.289953 | -1.155412 | -1.163580 |
| C | -1.605285 | -1.179124 | -0.702135 |
| C | -1.605360 | -1.179044 | 0.702028  |
| C | -0.290062 | -1.155094 | 1.163602  |
| H | 0.011904  | -1.264854 | -2.196646 |
| H | -2.486201 | -1.096973 | -1.324552 |
| H | -2.486349 | -1.096874 | 1.324339  |
| H | 0.011643  | -1.264512 | 2.196717  |
| H | 0.409489  | -2.662120 | 0.000311  |
| C | 0.077786  | 1.053424  | -0.806130 |
| C | 0.077700  | 1.053286  | 0.806106  |
| B | 1.296326  | 1.301294  | 0.000131  |
| B | -1.088435 | 1.460951  | -0.000022 |
| C | 2.083637  | -1.330365 | 0.000070  |
| H | 2.626414  | -2.275595 | 0.000039  |
| H | 2.403571  | -0.779145 | -0.885951 |
| H | 2.403672  | -0.779156 | 0.886054  |
| F | 2.578968  | 1.586994  | -0.000101 |
| F | -2.364531 | 1.767041  | -0.000020 |

**TS-B8-anti**

E= -3093.20171349 a.u.

$\nu$ = 392.7066i

|    |           |           |           |
|----|-----------|-----------|-----------|
| C  | 0.599394  | 0.293830  | -0.000049 |
| C  | -0.004166 | -0.443851 | -1.172389 |
| C  | -0.341746 | -1.705159 | -0.705206 |
| C  | -0.341817 | -1.705226 | 0.704804  |
| C  | -0.004323 | -0.443940 | 1.172169  |
| H  | 0.529162  | 1.375328  | -0.000017 |
| H  | 0.204091  | -0.179547 | -2.198360 |
| H  | -0.657763 | -2.532264 | -1.325901 |
| H  | -0.657896 | -2.532395 | 1.325381  |
| H  | 0.203876  | -0.179768 | 2.198185  |
| C  | -1.969931 | 0.580855  | -0.810983 |
| C  | -1.969836 | 0.580904  | 0.811042  |
| B  | -1.687510 | 1.785601  | -0.000026 |
| B  | -2.764108 | -0.366397 | 0.000111  |
| Br | 2.553027  | 0.000276  | 0.000085  |
| F  | -1.256821 | 3.024752  | -0.000071 |
| F  | -3.468153 | -1.469365 | 0.000183  |

**TS-B8-syn**

E= -3093.20009011 a.u.

$\nu$ = 391.0356i

|   |           |           |           |
|---|-----------|-----------|-----------|
| C | 0.360207  | -1.260801 | -0.000010 |
| C | -0.564672 | -1.104720 | -1.176056 |
| C | -1.787721 | -1.571755 | -0.704877 |
| C | -1.787758 | -1.571778 | 0.704724  |
| C | -0.564736 | -1.104753 | 1.175988  |
| H | -0.227648 | -1.114892 | -2.202222 |

|    |           |           |           |
|----|-----------|-----------|-----------|
| H  | -2.645317 | -1.798580 | -1.323743 |
| H  | -2.645388 | -1.798630 | 1.323533  |
| H  | -0.227776 | -1.114963 | 2.202175  |
| H  | 0.649970  | -2.317181 | -0.000016 |
| C  | -0.894707 | 1.105588  | -0.796659 |
| C  | -0.894649 | 1.105607  | 0.796662  |
| B  | 0.186614  | 1.753474  | -0.000043 |
| B  | -2.132322 | 1.102941  | 0.000051  |
| Br | 2.054096  | -0.331709 | 0.000044  |
| F  | -3.434277 | 0.935438  | 0.000104  |
| F  | 1.182670  | 2.607633  | -0.000096 |

**TS-B9-anti**

E= -979.226726172 a.u.

v= 390.0671i

|    |           |           |           |
|----|-----------|-----------|-----------|
| C  | -1.135590 | 0.279362  | 0.000214  |
| C  | -0.519227 | -0.456710 | 1.173465  |
| C  | -0.179469 | -1.713794 | 0.706078  |
| C  | -0.179671 | -1.713229 | -0.707555 |
| C  | -0.519586 | -0.455788 | -1.173806 |
| H  | -1.049625 | 1.360384  | 0.000684  |
| H  | -0.727772 | -0.192948 | 2.199688  |
| H  | 0.139263  | -2.541498 | 1.324773  |
| H  | 0.138900  | -2.540424 | -1.327014 |
| H  | -0.728419 | -0.191155 | -2.199748 |
| C  | 1.443414  | 0.590797  | 0.809637  |
| C  | 1.443543  | 0.590670  | -0.809434 |
| B  | 1.148699  | 1.793113  | -0.000021 |
| B  | 2.239870  | -0.354977 | 0.000270  |
| Cl | -2.925598 | 0.002259  | 0.000386  |
| F  | 2.944012  | -1.457625 | 0.000402  |
| F  | 0.711487  | 3.029704  | -0.000156 |

**TS-B9-syn**

E= -979.229442163 a.u.

v= 380.8582i

|    |           |           |           |
|----|-----------|-----------|-----------|
| C  | -0.532970 | -1.425447 | 0.000068  |
| C  | 0.353633  | -1.115777 | 1.176231  |
| C  | 1.638423  | -1.357983 | 0.705821  |
| C  | 1.638591  | -1.358342 | -0.705092 |
| C  | 0.353969  | -1.116466 | -1.175944 |
| H  | 0.021687  | -1.182896 | 2.201964  |
| H  | 2.522843  | -1.427453 | 1.324376  |
| H  | 2.523171  | -1.428165 | -1.323375 |
| H  | 0.022263  | -1.183679 | -2.201738 |
| H  | -0.638741 | -2.516600 | 0.000377  |
| C  | 0.264510  | 1.119967  | 0.796268  |
| C  | 0.264260  | 1.120210  | -0.796484 |
| B  | -0.927468 | 1.529008  | 0.000055  |
| B  | 1.480999  | 1.347924  | -0.000274 |
| Cl | -2.200680 | -0.815835 | -0.000318 |
| F  | 2.791211  | 1.422789  | -0.000368 |
| F  | -2.090080 | 2.135694  | 0.000333  |

**TS-B10-anti**

E= -618.861018640 a.u.

v= 382.8998i

|   |           |           |           |
|---|-----------|-----------|-----------|
| C | -1.441959 | 0.353335  | 0.000386  |
| C | -0.862685 | -0.423649 | 1.178858  |
| C | -0.618433 | -1.694500 | 0.711475  |
| C | -0.618462 | -1.693779 | -0.712783 |
| C | -0.862694 | -0.422461 | -1.178905 |
| H | -1.281896 | 1.429871  | 0.001109  |
| H | -1.044221 | -0.147388 | 2.207016  |
| H | -0.364570 | -2.548943 | 1.324616  |
| H | -0.364622 | -2.547607 | -1.326790 |
| H | -1.044074 | -0.145031 | -2.206777 |
| C | 1.167689  | 0.538890  | 0.805722  |
| C | 1.168160  | 0.539038  | -0.805590 |
| B | 0.931699  | 1.756148  | 0.000033  |
| B | 1.892658  | -0.463526 | 0.000160  |
| F | -2.822925 | 0.188855  | 0.000270  |

|   |          |           |          |
|---|----------|-----------|----------|
| F | 0.579237 | 3.018622  | 0.000024 |
| F | 2.509011 | -1.616951 | 0.000249 |

**TS-B10-syn**

E= -618.874612286 a.u.

v= 366.3245i

|   |           |           |           |
|---|-----------|-----------|-----------|
| C | 0.304142  | -1.595400 | -0.000018 |
| C | -0.477615 | -1.077961 | -1.177737 |
| C | -1.775286 | -0.963677 | -0.707906 |
| C | -1.775282 | -0.963706 | 0.707908  |
| C | -0.477610 | -1.078014 | 1.177726  |
| H | -0.177036 | -1.229109 | -2.204132 |
| H | -2.649193 | -0.801585 | -1.323824 |
| H | -2.649186 | -0.801637 | 1.323838  |
| H | -0.177024 | -1.229205 | 2.204113  |
| H | 0.196527  | -2.688124 | -0.000042 |
| C | 0.310233  | 1.019515  | -0.795176 |
| C | 0.310223  | 1.019478  | 0.795184  |
| B | 1.565448  | 0.920896  | 0.000007  |
| B | -0.765561 | 1.631308  | 0.000006  |
| F | 1.657495  | -1.333260 | -0.000013 |
| F | 2.872846  | 0.968398  | 0.000014  |
| F | -1.981047 | 2.123443  | 0.000010  |

**P-B1-anti**

E= -658.247604708 a.u.

v= 124.2089

|   |           |           |           |
|---|-----------|-----------|-----------|
| C | -1.357852 | -0.063028 | 0.000048  |
| C | -0.417906 | -0.492449 | 1.159233  |
| C | -0.099315 | -1.893460 | 0.670978  |
| C | -0.099341 | -1.893492 | -0.670866 |
| C | -0.417983 | -0.492512 | -1.159177 |
| H | -0.834925 | -0.394597 | 2.159146  |
| H | 0.174658  | -2.720089 | 1.313308  |
| H | 0.174603  | -2.720154 | -1.313167 |
| H | -0.835069 | -0.394716 | -2.159068 |
| C | 0.835074  | 0.391796  | 0.856734  |
| C | 0.835013  | 0.391752  | -0.856813 |
| B | 0.670110  | 1.643030  | -0.000066 |
| B | 1.911371  | -0.225261 | -0.000062 |
| C | -2.764540 | -0.617638 | 0.000112  |
| H | -3.294185 | -0.262013 | 0.885399  |
| H | -3.294244 | -0.262070 | -0.885164 |
| H | -2.760710 | -1.705282 | 0.000147  |
| F | 2.954948  | -1.022685 | -0.000079 |
| F | 0.608027  | 2.952629  | -0.000099 |
| F | -1.487023 | 1.334975  | 0.000016  |

**P-B1-syn**

E= -658.234347588 a.u.

v= 122.7278

|   |           |           |           |
|---|-----------|-----------|-----------|
| C | 1.360106  | -0.232426 | 0.000007  |
| C | 0.361463  | -0.532020 | -1.159221 |
| C | -0.166914 | -1.874840 | -0.669605 |
| C | -0.166943 | -1.874826 | 0.669582  |
| C | 0.361433  | -0.532008 | 1.159212  |
| H | 0.793775  | -0.498739 | -2.156753 |
| H | -0.557980 | -2.650353 | -1.314471 |
| H | -0.558039 | -2.650326 | 1.314446  |
| H | 0.793723  | -0.498740 | 2.156755  |
| C | -0.765606 | 0.503382  | -0.862896 |
| C | -0.765621 | 0.503401  | 0.862867  |
| B | -0.545287 | 1.732227  | -0.000025 |
| B | -1.900640 | 0.001573  | -0.000032 |
| C | 2.053121  | 1.126279  | 0.000025  |
| H | 3.128525  | 0.956171  | 0.000131  |
| H | 1.811591  | 1.715083  | -0.887719 |
| H | 1.811437  | 1.715061  | 0.887746  |
| F | -0.263396 | 3.014423  | -0.000011 |
| F | -3.053836 | -0.624543 | 0.000034  |
| F | 2.359496  | -1.198637 | 0.000014  |

**P-B2-anti**

E= -3192.50624318 a.u.

v= 107.5238

|    |           |           |           |
|----|-----------|-----------|-----------|
| C  | -0.582174 | 0.299295  | 0.000000  |
| C  | 0.212186  | -0.339622 | 1.166413  |
| C  | 0.212186  | -1.774910 | 0.670174  |
| C  | 0.212186  | -1.774910 | -0.670174 |
| C  | 0.212186  | -0.339622 | -1.166413 |
| H  | -0.185943 | -0.146105 | 2.158502  |
| H  | 0.276561  | -2.640082 | 1.315670  |
| H  | 0.276561  | -2.640082 | -1.315670 |
| H  | -0.185943 | -0.146105 | -2.158502 |
| C  | 1.629892  | 0.237483  | 0.859691  |
| C  | 1.629892  | 0.237483  | -0.859691 |
| B  | 1.784895  | 1.487341  | 0.000000  |
| B  | 2.528557  | -0.621322 | 0.000000  |
| Br | -2.481537 | -0.098999 | 0.000000  |
| F  | 1.982783  | 2.778896  | 0.000000  |
| F  | 3.377995  | -1.619224 | 0.000000  |
| F  | -0.477759 | 1.666556  | 0.000000  |

**P-B2-syn**

E= -3192.50101090 a.u.

v= 94.3435

|    |           |           |           |
|----|-----------|-----------|-----------|
| C  | -1.051714 | -0.282202 | 0.000000  |
| C  | -0.211118 | -0.864104 | 1.166428  |
| C  | -0.211118 | -2.307799 | 0.670054  |
| C  | -0.211118 | -2.307799 | -0.670054 |
| C  | -0.211118 | -0.864104 | -1.166428 |
| H  | -0.614392 | -0.676147 | 2.157890  |
| H  | -0.146999 | -3.172214 | 1.316959  |
| H  | -0.146999 | -3.172214 | -1.316959 |
| H  | -0.614392 | -0.676147 | -2.157890 |
| C  | 1.196643  | -0.291861 | 0.857421  |
| C  | 1.196643  | -0.291861 | -0.857421 |
| B  | 1.418918  | 0.956758  | 0.000000  |
| B  | 2.087489  | -1.160426 | 0.000000  |
| Br | -1.179953 | 1.670073  | 0.000000  |
| F  | 2.925883  | -2.168945 | 0.000000  |
| F  | 1.881192  | 2.185441  | 0.000000  |
| F  | -2.328573 | -0.736399 | 0.000000  |

**P-B3-anti**

E= -1078.53545202 a.u.

v= 118.9537

|    |           |           |           |
|----|-----------|-----------|-----------|
| C  | -1.058011 | 0.271345  | 0.000000  |
| C  | -0.259707 | -0.363580 | 1.165955  |
| C  | -0.259707 | -1.799591 | 0.670138  |
| C  | -0.259707 | -1.799591 | -0.670138 |
| C  | -0.259707 | -0.363580 | -1.165955 |
| H  | -0.661317 | -0.169248 | 2.156696  |
| H  | -0.191712 | -2.664527 | 1.315655  |
| H  | -0.191712 | -2.664527 | -1.315655 |
| H  | -0.661317 | -0.169248 | -2.156696 |
| C  | 1.156168  | 0.215728  | 0.860016  |
| C  | 1.156168  | 0.215728  | -0.860016 |
| B  | 1.305478  | 1.466471  | 0.000000  |
| B  | 2.059029  | -0.638079 | 0.000000  |
| F  | -0.953993 | 1.640384  | 0.000000  |
| F  | 1.495726  | 2.759432  | 0.000000  |
| F  | 2.911421  | -1.633335 | 0.000000  |
| Cl | -2.793403 | -0.095970 | 0.000000  |

**P-B3-syn**

E= -1078.53162176 a.u.

v= 118.5507

|   |           |           |           |
|---|-----------|-----------|-----------|
| C | -1.256334 | 0.048945  | 0.000000  |
| C | -0.420993 | -0.541658 | 1.166037  |
| C | -0.420993 | -1.983835 | 0.670080  |
| C | -0.420993 | -1.983835 | -0.670080 |
| C | -0.420993 | -0.541658 | -1.166037 |
| H | -0.825472 | -0.351828 | 2.156747  |

|    |           |           |           |
|----|-----------|-----------|-----------|
| H  | -0.355139 | -2.848415 | 1.316488  |
| H  | -0.355139 | -2.848415 | -1.316488 |
| H  | -0.825472 | -0.351828 | -2.156747 |
| C  | 0.988995  | 0.031051  | 0.858032  |
| C  | 0.988995  | 0.031051  | -0.858032 |
| B  | 1.199690  | 1.277457  | 0.000000  |
| B  | 1.881170  | -0.835758 | 0.000000  |
| F  | -2.535882 | -0.399703 | 0.000000  |
| F  | 1.572676  | 2.533583  | 0.000000  |
| F  | 2.722239  | -1.841409 | 0.000000  |
| Cl | -1.358853 | 1.835258  | 0.000000  |

**P-B4-anti**

E= -1018.60141948 a.u.

v= 118.3101

|    |           |           |           |
|----|-----------|-----------|-----------|
| C  | 1.069022  | 0.739835  | 0.000049  |
| C  | 0.029051  | 0.730031  | 1.156847  |
| C  | -0.819204 | 1.894430  | 0.670336  |
| C  | -0.819174 | 1.894485  | -0.670221 |
| C  | 0.029096  | 0.730121  | -1.156790 |
| H  | 0.448878  | 0.808338  | 2.157790  |
| H  | -1.400523 | 2.538661  | 1.316748  |
| H  | -1.400465 | 2.538768  | -1.316608 |
| H  | 0.448962  | 0.808505  | -2.157710 |
| C  | -0.765970 | -0.571939 | 0.848550  |
| C  | -0.765937 | -0.571872 | -0.848621 |
| B  | -0.081754 | -1.669758 | -0.000065 |
| B  | -2.005239 | -0.445005 | -0.000055 |
| C  | 2.114309  | 1.838563  | 0.000114  |
| H  | 2.746178  | 1.761875  | 0.886255  |
| H  | 2.746228  | 1.761936  | -0.885996 |
| H  | 1.627511  | 2.812227  | 0.000134  |
| F  | -3.278584 | -0.120884 | -0.000067 |
| F  | 0.111064  | -2.988278 | -0.000114 |
| Cl | 1.958748  | -0.857410 | 0.000001  |

**P-B4-syn**

E= -1018.58996617 a.u.

v= 103.4547

|    |           |           |           |
|----|-----------|-----------|-----------|
| C  | -1.078223 | 0.368148  | 0.000001  |
| C  | -0.282489 | -0.315980 | 1.157345  |
| C  | -0.297242 | -1.759810 | 0.669204  |
| C  | -0.297248 | -1.759811 | -0.669197 |
| C  | -0.282508 | -0.315985 | -1.157354 |
| H  | -0.664522 | -0.120965 | 2.156509  |
| H  | -0.223305 | -2.623055 | 1.316704  |
| H  | -0.223327 | -2.623066 | -1.316687 |
| H  | -0.664553 | -0.120976 | -2.156513 |
| C  | 1.167220  | 0.185347  | 0.860908  |
| C  | 1.167202  | 0.185339  | -0.860935 |
| B  | 1.481591  | 1.396056  | -0.000020 |
| B  | 1.994644  | -0.744408 | -0.000030 |
| C  | -1.102261 | 1.899276  | 0.000043  |
| H  | -2.123835 | 2.269345  | 0.000028  |
| H  | -0.613524 | 2.305942  | 0.889172  |
| H  | -0.613485 | 2.305962  | -0.889049 |
| F  | 1.791260  | 2.671389  | -0.000016 |
| F  | 2.806809  | -1.775351 | 0.000027  |
| Cl | -2.800232 | -0.213819 | -0.000007 |

**P-B5-anti**

E= -3132.57111705 a.u.

v= 109.7249

|   |           |          |           |
|---|-----------|----------|-----------|
| C | 0.450771  | 1.088633 | 0.000049  |
| C | -0.536332 | 0.756871 | 1.157264  |
| C | -1.689392 | 1.624531 | 0.670312  |
| C | -1.689338 | 1.624644 | -0.670209 |
| C | -0.536311 | 0.756971 | -1.157209 |
| H | -0.160029 | 0.952546 | 2.159316  |
| H | -2.430512 | 2.073908 | 1.318208  |
| H | -2.430417 | 2.074114 | -1.318088 |
| H | -0.159983 | 0.952719 | -2.159237 |

|    |           |           |           |
|----|-----------|-----------|-----------|
| C  | -0.928654 | -0.715168 | 0.847698  |
| C  | -0.928654 | -0.715094 | -0.847758 |
| B  | 0.008219  | -1.607988 | -0.000068 |
| B  | -2.156261 | -0.933245 | -0.000039 |
| C  | 1.098051  | 2.462810  | 0.000111  |
| H  | 1.722387  | 2.589147  | 0.885628  |
| H  | 1.722384  | 2.589232  | -0.885396 |
| H  | 0.331213  | 3.236081  | 0.000150  |
| F  | -3.469825 | -0.983092 | -0.000043 |
| F  | 0.508855  | -2.842762 | -0.000119 |
| Br | 1.924373  | -0.246688 | -0.000004 |

**P-B5-syn**

E= -3132.56131452 a.u.

v= 104.8506

|    |           |           |           |
|----|-----------|-----------|-----------|
| C  | -0.577143 | 0.450691  | -0.000046 |
| C  | 0.172274  | -0.280448 | 1.157502  |
| C  | 0.082147  | -1.721205 | 0.669196  |
| C  | 0.082123  | -1.721203 | -0.669304 |
| C  | 0.172289  | -0.280452 | -1.157602 |
| H  | -0.195536 | -0.065535 | 2.157641  |
| H  | 0.111396  | -2.587269 | 1.316506  |
| H  | 0.111347  | -2.587286 | -1.316591 |
| H  | -0.195482 | -0.065498 | -2.157744 |
| C  | 1.649826  | 0.138700  | 0.860498  |
| C  | 1.649852  | 0.138680  | -0.860529 |
| B  | 2.035595  | 1.329357  | 0.000009  |
| B  | 2.421164  | -0.838449 | -0.000019 |
| C  | -0.512210 | 1.980094  | -0.000049 |
| H  | -1.504804 | 2.420679  | -0.000834 |
| H  | 0.001804  | 2.353096  | 0.890066  |
| H  | 0.003043  | 2.353023  | -0.889461 |
| F  | 2.422075  | 2.583426  | 0.000048  |
| F  | 3.174465  | -1.913282 | 0.000086  |
| Br | -2.494268 | -0.072462 | 0.000036  |

**P-B6-anti**

E= -3552.85776263 a.u.

v= 71.8033

|    |           |           |           |
|----|-----------|-----------|-----------|
| C  | -0.596250 | 0.144399  | 0.000000  |
| C  | 0.222899  | -0.480224 | 1.163977  |
| C  | 0.222899  | -1.918509 | 0.669537  |
| C  | 0.222899  | -1.918509 | -0.669537 |
| C  | 0.222899  | -0.480224 | -1.163977 |
| H  | -0.175704 | -0.291074 | 2.157203  |
| H  | 0.293271  | -2.780839 | 1.318145  |
| H  | 0.293271  | -2.780839 | -1.318145 |
| H  | -0.175704 | -0.291074 | -2.157203 |
| C  | 1.629553  | 0.101908  | 0.854063  |
| C  | 1.629553  | 0.101908  | -0.854063 |
| B  | 1.763434  | 1.380273  | 0.000000  |
| B  | 2.543285  | -0.745126 | 0.000000  |
| Br | -2.481426 | -0.308359 | 0.000000  |
| F  | 2.330867  | 2.576567  | 0.000000  |
| F  | 3.394336  | -1.742709 | 0.000000  |
| Cl | -0.457197 | 1.938321  | 0.000000  |

**P-B6-syn**

E= -3552.85630587 a.u.

v= 94.2196

|   |           |           |           |
|---|-----------|-----------|-----------|
| C | -0.918682 | -0.229261 | 0.000000  |
| C | -0.085470 | -0.836739 | 1.163710  |
| C | -0.085470 | -2.277748 | 0.669517  |
| C | -0.085470 | -2.277748 | -0.669517 |
| C | -0.085470 | -0.836739 | -1.163710 |
| H | -0.485247 | -0.648855 | 2.156874  |
| H | -0.015519 | -3.139600 | 1.318908  |
| H | -0.015519 | -3.139600 | -1.318908 |
| H | -0.485247 | -0.648855 | -2.156874 |
| C | 1.318888  | -0.258050 | 0.852389  |
| C | 1.318888  | -0.258050 | -0.852389 |
| B | 1.476544  | 1.023010  | 0.000000  |

|    |           |           |          |
|----|-----------|-----------|----------|
| B  | 2.230767  | -1.108585 | 0.000000 |
| Br | -0.798613 | 1.734353  | 0.000000 |
| F  | 3.079393  | -2.108864 | 0.000000 |
| F  | 2.136106  | 2.175766  | 0.000000 |
| Cl | -2.634491 | -0.673745 | 0.000000 |

**P-B7-anti**

E= -558.993958421 a.u.

v= 120.9504

|   |           |           |           |
|---|-----------|-----------|-----------|
| C | -1.406228 | 0.516899  | 0.000043  |
| C | -0.620417 | -0.175813 | 1.155031  |
| C | -0.674333 | -1.617603 | 0.670029  |
| C | -0.674440 | -1.617624 | -0.669928 |
| C | -0.620509 | -0.175854 | -1.154980 |
| H | -1.232981 | 1.599628  | 0.000014  |
| H | -0.979914 | 0.018510  | 2.163003  |
| H | -0.601691 | -2.485885 | 1.312408  |
| H | -0.601886 | -2.485928 | -1.312288 |
| H | -0.980082 | 0.018442  | -2.162931 |
| C | 0.845215  | 0.309716  | 0.862234  |
| C | 0.845153  | 0.309672  | -0.862305 |
| B | 1.037884  | 1.536863  | -0.000073 |
| B | 1.698967  | -0.589862 | -0.000042 |
| C | -2.910347 | 0.280093  | 0.000104  |
| H | -3.364740 | 0.736777  | 0.882307  |
| H | -3.364812 | 0.736776  | -0.882062 |
| H | -3.155546 | -0.782221 | 0.000115  |
| F | 2.492846  | -1.636118 | -0.000042 |
| F | 1.050800  | 2.850782  | -0.000109 |

**P-B7-syn**

E= -558.992183800 a.u.

v= 136.8139

|   |           |           |           |
|---|-----------|-----------|-----------|
| C | -0.725833 | -1.471641 | -0.000020 |
| C | 0.129177  | -0.869222 | 1.154132  |
| C | 1.506675  | -1.298394 | 0.670810  |
| C | 1.506904  | -1.297951 | -0.670615 |
| C | 0.129298  | -0.869316 | -1.154157 |
| H | -0.153619 | -1.164246 | 2.162291  |
| H | 2.362750  | -1.459595 | 1.313505  |
| H | 2.363162  | -1.458880 | -1.313142 |
| H | -0.153270 | -1.164337 | -2.162374 |
| H | -0.566084 | -2.551852 | 0.000189  |
| C | 0.034817  | 0.670244  | 0.858736  |
| C | 0.034840  | 0.670204  | -0.858887 |
| B | -1.058679 | 1.271759  | -0.000011 |
| B | 1.138646  | 1.236550  | -0.000155 |
| C | -2.220741 | -1.150854 | -0.000147 |
| H | -2.809684 | -2.068246 | -0.002666 |
| H | -2.521177 | -0.583421 | 0.885504  |
| H | -2.520434 | -0.579501 | -0.883509 |
| F | -2.229887 | 1.869433  | 0.000166  |
| F | 2.366298  | 1.707247  | 0.000047  |

**P-B8-anti**

E= -3093.26196418 a.u.

v= 94.1734

|    |           |           |           |
|----|-----------|-----------|-----------|
| C  | -0.587563 | 0.454873  | 0.000000  |
| C  | 0.187569  | -0.217374 | 1.161660  |
| C  | 0.187569  | -1.658285 | 0.669243  |
| C  | 0.187569  | -1.658285 | -0.669243 |
| C  | 0.187569  | -0.217374 | -1.161660 |
| H  | -0.536836 | 1.543954  | 0.000000  |
| H  | -0.196483 | -0.028695 | 2.159721  |
| H  | 0.279202  | -2.521212 | 1.314873  |
| H  | 0.279202  | -2.521212 | -1.314873 |
| H  | -0.196483 | -0.028695 | -2.159721 |
| C  | 1.625678  | 0.333409  | 0.865140  |
| C  | 1.625678  | 0.333409  | -0.865140 |
| B  | 1.775592  | 1.567973  | 0.000000  |
| B  | 2.510990  | -0.535857 | 0.000000  |
| Br | -2.496194 | 0.059229  | 0.000000  |



|   |          |           |          |
|---|----------|-----------|----------|
| F | 1.731255 | 2.878621  | 0.000000 |
| F | 3.359950 | -1.534174 | 0.000000 |

**P-B8-syn**

E= -3093.26677523 a.u.

v= 103.2151

|    |           |           |           |
|----|-----------|-----------|-----------|
| C  | -1.218504 | -0.342764 | 0.000000  |
| C  | -0.368234 | -0.911044 | 1.161414  |
| C  | -0.368234 | -2.353785 | 0.671098  |
| C  | -0.368234 | -2.353785 | -0.671098 |
| C  | -0.368234 | -0.911044 | -1.161414 |
| H  | -0.750822 | -0.729475 | 2.162064  |
| H  | -0.292327 | -3.219226 | 1.316342  |
| H  | -0.292327 | -3.219226 | -1.316342 |
| H  | -0.750822 | -0.729475 | -2.162064 |
| H  | -2.233007 | -0.732513 | 0.000000  |
| C  | 1.047633  | -0.332684 | 0.853627  |
| C  | 1.047633  | -0.332684 | -0.853627 |
| B  | 1.266230  | 0.915119  | 0.000000  |
| B  | 1.940595  | -1.198049 | 0.000000  |
| Br | -1.382081 | 1.597334  | 0.000000  |
| F  | 2.762302  | -2.223225 | 0.000000  |
| F  | 1.708260  | 2.152626  | 0.000000  |

**P-B9-anti**

E= -979.289493944 a.u.

v= 106.1825

|    |           |           |           |
|----|-----------|-----------|-----------|
| C  | -1.108627 | 0.456600  | 0.000000  |
| C  | -0.327272 | -0.210896 | 1.161409  |
| C  | -0.327272 | -1.651988 | 0.669273  |
| C  | -0.327272 | -1.651988 | -0.669273 |
| C  | -0.327272 | -0.210896 | -1.161409 |
| H  | -1.053890 | 1.546166  | 0.000000  |
| H  | -0.714368 | -0.021913 | 2.158487  |
| H  | -0.235956 | -2.515244 | 1.314559  |
| H  | -0.235956 | -2.515244 | -1.314559 |
| H  | -0.714368 | -0.021913 | -2.158487 |
| C  | 1.107017  | 0.344909  | 0.865118  |
| C  | 1.107017  | 0.344909  | -0.865118 |
| B  | 1.251231  | 1.580017  | 0.000000  |
| B  | 1.997798  | -0.518204 | 0.000000  |
| Cl | -2.856175 | 0.075652  | 0.000000  |
| F  | 2.852139  | -1.511901 | 0.000000  |
| F  | 1.201911  | 2.890691  | 0.000000  |

**P-B9-syn**

E= -979.295838656 a.u.

v= 120.3687

|    |           |           |           |
|----|-----------|-----------|-----------|
| C  | -1.485961 | 0.000156  | 0.000000  |
| C  | -0.641742 | -0.578118 | 1.161152  |
| C  | -0.641742 | -2.019130 | 0.671086  |
| C  | -0.641742 | -2.019130 | -0.671086 |
| C  | -0.641742 | -0.578118 | -1.161152 |
| H  | -1.025777 | -0.395206 | 2.161133  |
| H  | -0.564204 | -2.884900 | 1.315613  |
| H  | -0.564204 | -2.884900 | -1.315613 |
| H  | -1.025777 | -0.395206 | -2.161133 |
| H  | -2.503839 | -0.382094 | 0.000000  |
| C  | 0.773656  | 0.004436  | 0.854367  |
| C  | 0.773656  | 0.004436  | -0.854367 |
| B  | 0.973536  | 1.252656  | 0.000000  |
| B  | 1.671346  | -0.855134 | 0.000000  |
| Cl | -1.596892 | 1.785368  | 0.000000  |
| F  | 2.498963  | -1.875117 | 0.000000  |
| F  | 1.349953  | 2.510254  | 0.000000  |

**P-B10-anti**

E= -618.929355040 a.u.

v= 121.4999

|   |           |           |           |
|---|-----------|-----------|-----------|
| C | -1.429373 | 0.430723  | 0.000000  |
| C | -0.635605 | -0.215282 | 1.162509  |
| C | -0.635605 | -1.655788 | 0.669659  |
| C | -0.635605 | -1.655788 | -0.669659 |

|   |           |           |           |
|---|-----------|-----------|-----------|
| C | -0.635605 | -0.215282 | -1.162509 |
| H | -1.415063 | 1.525878  | 0.000000  |
| H | -1.028294 | -0.028524 | 2.158230  |
| H | -0.550525 | -2.521347 | 1.312980  |
| H | -0.550525 | -2.521347 | -1.312980 |
| H | -1.028294 | -0.028524 | -2.158230 |
| C | 0.785618  | 0.363249  | 0.866399  |
| C | 0.785618  | 0.363249  | -0.866399 |
| B | 0.910988  | 1.599790  | 0.000000  |
| B | 1.692617  | -0.479114 | 0.000000  |
| F | -2.749009 | 0.048307  | 0.000000  |
| F | 0.850120  | 2.910571  | 0.000000  |
| F | 2.560892  | -1.461099 | 0.000000  |

**P-B10-syn**

E= -618.939087595 a.u.

v= 129.6035

|   |           |           |           |
|---|-----------|-----------|-----------|
| C | -1.599724 | 0.200195  | 0.000000  |
| C | -0.778264 | -0.396700 | 1.162254  |
| C | -0.778264 | -1.832240 | 0.671479  |
| C | -0.778264 | -1.832240 | -0.671479 |
| C | -0.778264 | -0.396700 | -1.162254 |
| H | -1.165131 | -0.212518 | 2.161022  |
| H | -0.708153 | -2.700685 | 1.313193  |
| H | -0.708153 | -2.700685 | -1.313193 |
| H | -1.165131 | -0.212518 | -2.161022 |
| H | -2.643985 | -0.111053 | 0.000000  |
| C | 0.629223  | 0.213349  | 0.857628  |
| C | 0.629223  | 0.213349  | -0.857628 |
| B | 0.737575  | 1.467006  | 0.000000  |
| B | 1.553118  | -0.613580 | 0.000000  |
| F | -1.559187 | 1.585712  | 0.000000  |
| F | 0.894876  | 2.766647  | 0.000000  |
| F | 2.404656  | -1.612775 | 0.000000  |

**C1**

E= -1284.60034497 a.u.

v= 12.8949

|   |           |           |           |
|---|-----------|-----------|-----------|
| N | -5.833412 | -0.436496 | -0.072918 |
| C | -6.937672 | 0.248874  | -0.337418 |
| C | -6.919183 | 1.627397  | -0.551584 |
| N | -5.793276 | 2.329828  | -0.499212 |
| C | -4.700225 | 0.261215  | -0.036194 |
| C | -4.683408 | 1.641258  | -0.243530 |
| C | -3.442657 | -0.508844 | 0.294243  |
| O | -3.434871 | -1.416905 | 1.098850  |
| N | -2.328953 | -0.093229 | -0.360320 |
| C | -1.046706 | -0.692048 | -0.077052 |
| C | 0.042712  | 0.248533  | -0.584098 |
| O | -0.247430 | 1.191999  | -1.282319 |
| C | -0.930397 | -2.104070 | -0.714821 |
| C | 0.165537  | -2.954506 | -0.123939 |
| C | 1.241236  | -3.397004 | -0.891803 |
| C | 2.258809  | -4.156715 | -0.320517 |
| C | 2.209878  | -4.481745 | 1.030467  |
| C | 1.129402  | -4.060139 | 1.801821  |
| C | 0.112695  | -3.307016 | 1.227113  |
| C | 1.472558  | -0.085371 | -0.225373 |
| C | 2.396814  | 1.136236  | -0.176247 |
| C | 3.873479  | 0.699494  | 0.040853  |
| C | 1.906735  | 2.081559  | 0.932225  |
| C | 2.638983  | 3.416475  | 1.104912  |
| C | 2.566841  | 4.264896  | -0.165383 |
| C | 2.032154  | 4.180693  | 2.282999  |
| C | 4.285845  | -0.608197 | -0.593589 |
| C | 5.371187  | -0.424334 | -1.360376 |
| C | 5.755887  | 0.993322  | -1.315320 |
| C | 4.908805  | 1.653256  | -0.511220 |
| H | -7.867801 | -0.308400 | -0.378770 |
| H | -7.833961 | 2.170280  | -0.764982 |

|   |           |           |           |
|---|-----------|-----------|-----------|
| H | -3.759572 | 2.208411  | -0.180094 |
| H | -2.346228 | 0.647379  | -1.048313 |
| H | -0.942502 | -0.797280 | 1.008410  |
| H | -1.894281 | -2.588093 | -0.539876 |
| H | -0.800633 | -1.997409 | -1.795894 |
| H | 1.285540  | -3.142452 | -1.946578 |
| H | 3.089111  | -4.491993 | -0.931555 |
| H | 3.002494  | -5.068696 | 1.478983  |
| H | 1.076045  | -4.325680 | 2.851225  |
| H | -0.740186 | -2.995068 | 1.823690  |
| H | 1.503486  | -0.655202 | 0.710214  |
| H | 1.804368  | -0.778096 | -1.006442 |
| H | 2.322468  | 1.634299  | -1.147039 |
| H | 4.032912  | 0.600388  | 1.127871  |
| H | 0.851626  | 2.315247  | 0.747949  |
| H | 1.947503  | 1.531473  | 1.882476  |
| H | 3.688359  | 3.217071  | 1.348184  |
| H | 3.058943  | 5.229659  | -0.017743 |
| H | 3.035914  | 3.775706  | -1.021197 |
| H | 1.521310  | 4.457626  | -0.427031 |
| H | 2.553875  | 5.125882  | 2.450541  |
| H | 2.082742  | 3.596634  | 3.205428  |
| H | 0.979837  | 4.409749  | 2.086669  |
| H | 3.792969  | -1.552487 | -0.400307 |
| H | 5.900919  | -1.190363 | -1.911290 |
| H | 6.596692  | 1.422531  | -1.843917 |
| H | 4.950100  | 2.708097  | -0.282728 |

## C2

E= -1089.29470268 a.u.

v= 18.7339

|   |           |           |           |
|---|-----------|-----------|-----------|
| O | 2.846021  | 1.506654  | 0.894627  |
| O | -0.069466 | -1.985675 | -0.526625 |
| N | 5.179291  | -0.091434 | 1.171631  |
| N | 1.884667  | -0.291361 | -0.084253 |
| N | 5.778498  | -1.567807 | -1.130427 |
| C | -1.821664 | -0.673551 | 0.383371  |
| C | -0.950604 | 2.165518  | -0.661950 |
| C | -4.167330 | -1.381278 | 0.549790  |
| C | -2.128379 | 2.068141  | -1.400543 |
| C | -3.253739 | 2.804276  | -1.041117 |
| C | -3.211099 | 3.647938  | 0.064017  |
| C | -6.573878 | -1.900485 | 0.795122  |
| C | -2.034756 | 3.761078  | 0.800743  |
| C | 6.659733  | -1.406480 | -0.149731 |
| C | -0.438310 | -0.926386 | -0.057797 |
| C | 6.360052  | -0.669574 | 0.996178  |
| C | 0.547257  | 0.230808  | 0.071933  |
| C | 2.948338  | 0.410794  | 0.383967  |
| C | 4.589421  | -0.996982 | -0.950342 |
| C | 4.286999  | -0.265187 | 0.198933  |
| C | -5.180518 | -2.244373 | 0.352842  |
| C | -5.049960 | -3.588880 | -0.302519 |
| C | -0.911718 | 3.026882  | 0.437157  |
| C | 0.259941  | 1.329709  | -0.987231 |
| C | -2.786985 | -1.581780 | 0.162835  |
| H | 1.959224  | -1.261621 | -0.362657 |
| H | -2.039229 | 0.270244  | 0.872215  |
| H | -4.386962 | -0.433930 | 1.036734  |
| H | -2.169526 | 1.398221  | -2.253372 |
| H | -4.163878 | 2.717451  | -1.623193 |
| H | -4.086618 | 4.221186  | 0.345664  |
| H | -6.622971 | -0.915856 | 1.259760  |
| H | -7.258819 | -1.918956 | -0.058630 |
| H | -6.941325 | -2.643519 | 1.509990  |
| H | -1.991549 | 4.424952  | 1.656306  |
| H | 7.633170  | -1.869009 | -0.275690 |
| H | 7.095102  | -0.543705 | 1.784387  |
| H | 0.452097  | 0.680592  | 1.066545  |
| H | 3.864462  | -1.107500 | -1.750713 |

|   |           |           |           |
|---|-----------|-----------|-----------|
| H | -5.418131 | -4.366056 | 0.374022  |
| H | -5.679348 | -3.626427 | -1.197188 |
| H | -4.031577 | -3.840657 | -0.588994 |
| H | 0.009669  | 3.116704  | 1.006219  |
| H | 0.158590  | 0.855274  | -1.967233 |
| H | 1.147748  | 1.965849  | -1.008266 |
| H | -2.496558 | -2.497998 | -0.342539 |

**C3**

E= -1127.39591398 a.u.

v= 12.7025

|   |           |           |           |
|---|-----------|-----------|-----------|
| O | 1.648626  | -1.442701 | -1.598639 |
| O | -0.306620 | 0.435782  | 2.391714  |
| N | 4.334121  | -1.773759 | -0.708946 |
| N | 1.225712  | -0.566734 | 0.444411  |
| N | 5.319495  | 0.495235  | 0.602778  |
| C | -2.187306 | 0.874164  | 0.980978  |
| C | -2.134507 | -2.320583 | 0.128369  |
| C | -2.010771 | 2.264045  | -1.156465 |
| C | -3.101818 | -2.510506 | 1.114136  |
| C | -4.449944 | -2.598374 | 0.776915  |
| C | -4.843673 | -2.495493 | -0.552584 |
| C | -3.882945 | -2.316675 | -1.545484 |
| C | 6.121824  | -0.471419 | 0.171470  |
| C | -0.865034 | 0.224385  | 1.341186  |
| C | 5.629506  | -1.601059 | -0.482412 |
| C | -0.208972 | -0.671955 | 0.295729  |
| C | 2.051475  | -0.988344 | -0.549129 |
| C | 4.018395  | 0.318006  | 0.384666  |
| C | 3.525077  | -0.814193 | -0.264837 |
| C | -2.537937 | -2.232180 | -1.206191 |
| C | -0.681143 | -2.138141 | 0.476504  |
| C | -1.874677 | 2.101181  | 0.171810  |
| C | -1.538160 | 3.600572  | -1.536742 |
| C | -1.107952 | 4.255788  | -0.443135 |
| C | -0.553528 | 5.640009  | -0.351476 |
| C | -1.280704 | 3.356261  | 0.753143  |
| H | 1.574908  | -0.327912 | 1.362938  |
| H | -2.802870 | 0.191560  | 0.392025  |
| H | -2.701905 | 1.127251  | 1.910625  |
| H | -2.412453 | 1.526823  | -1.842158 |
| H | -2.797081 | -2.580823 | 2.153757  |
| H | -5.191891 | -2.745184 | 1.553206  |
| H | -5.892575 | -2.561015 | -0.816153 |
| H | -4.183312 | -2.248454 | -2.584622 |
| H | 7.185795  | -0.347432 | 0.344132  |
| H | 6.301053  | -2.378645 | -0.831447 |
| H | -0.479962 | -0.332237 | -0.707355 |
| H | 3.351912  | 1.108584  | 0.715443  |
| H | -1.785951 | -2.097687 | -1.978845 |
| H | -0.484070 | -2.440026 | 1.508981  |
| H | -0.056691 | -2.744723 | -0.183434 |
| H | -1.541626 | 3.992001  | -2.546106 |
| H | -0.505584 | 6.106363  | -1.336321 |
| H | -1.171759 | 6.269781  | 0.295259  |
| H | 0.454350  | 5.633681  | 0.073697  |
| H | -1.945892 | 3.804925  | 1.501644  |
| H | -0.328974 | 3.162389  | 1.263725  |

**C4**

E= -1722.16138202 a.u.

v= 7.3676i

|    |           |           |           |
|----|-----------|-----------|-----------|
| O  | 1.487097  | -2.012468 | 1.046924  |
| Cl | 6.355916  | -1.318331 | -0.743431 |
| N  | -3.397917 | -0.841851 | 0.190455  |
| O  | -2.039138 | 0.860980  | -0.451215 |
| Cl | 1.506306  | 2.357815  | 0.666652  |
| N  | 0.215779  | -0.391315 | 0.154344  |
| C  | 4.985530  | -0.315016 | -0.367687 |
| C  | -8.226144 | -0.738377 | -0.065970 |
| C  | 2.653130  | -0.118176 | 0.228613  |

|   |           |           |           |
|---|-----------|-----------|-----------|
| C | 4.032533  | 1.855220  | -0.055743 |
| C | 3.771347  | -0.903029 | -0.064114 |
| C | -0.997775 | -1.116489 | 0.419400  |
| C | 5.127844  | 1.066714  | -0.369470 |
| C | 2.805092  | 1.269779  | 0.237795  |
| C | -2.178346 | -0.253185 | 0.004449  |
| C | 1.401746  | -0.911045 | 0.533713  |
| C | -7.018631 | 1.297107  | -0.822220 |
| C | -5.801258 | -0.763503 | 0.051036  |
| C | -4.600362 | -0.202727 | -0.121650 |
| C | -7.067249 | -0.101484 | -0.268600 |
| H | -3.432291 | -1.775394 | 0.574439  |
| H | 0.116008  | 0.530861  | -0.249481 |
| H | -9.175186 | -0.268093 | -0.293337 |
| H | -8.253736 | -1.746379 | 0.332737  |
| H | 4.123689  | 2.933292  | -0.030270 |
| H | 3.664133  | -1.979949 | -0.037521 |
| H | -1.072213 | -1.365250 | 1.483874  |
| H | -1.015913 | -2.063943 | -0.131002 |
| H | 6.083976  | 1.517493  | -0.602025 |
| H | -6.528214 | 1.977145  | -0.120107 |
| H | -6.453210 | 1.326520  | -1.757762 |
| H | -8.023832 | 1.669639  | -1.016000 |
| H | -5.867926 | -1.772099 | 0.453243  |
| H | -4.456491 | 0.794268  | -0.518134 |

### C5

E= -1218.84636398 a.u.

v= 16.7147

|   |           |           |           |
|---|-----------|-----------|-----------|
| C | -3.791705 | 2.399309  | 1.076399  |
| C | -3.805526 | 2.683848  | -0.254973 |
| S | -3.782777 | 1.254794  | -1.213719 |
| C | -3.753625 | 0.242883  | 0.190727  |
| C | -3.760215 | 0.996014  | 1.331113  |
| C | -3.662451 | -1.246333 | 0.074023  |
| C | -2.261742 | -1.827345 | -0.097966 |
| O | -2.122378 | -2.991968 | -0.444922 |
| N | -1.224574 | -1.000566 | 0.187757  |
| C | 0.149270  | -1.324851 | 0.124626  |
| C | 3.459749  | 0.205806  | 0.620064  |
| C | 2.502485  | -0.684992 | 0.343010  |
| C | 1.083337  | -0.397021 | 0.393721  |
| C | 4.920497  | -0.115116 | 0.574860  |
| C | 5.722490  | 0.902919  | -0.199940 |
| O | 5.344092  | 1.984395  | -0.552767 |
| O | 6.976148  | 0.463170  | -0.436653 |
| O | 0.449834  | -2.586255 | -0.201619 |
| H | -3.810359 | 3.156068  | 1.848121  |
| H | -3.837653 | 3.650901  | -0.732499 |
| H | -3.749981 | 0.558016  | 2.321559  |
| H | -4.070445 | -1.709052 | 0.977467  |
| H | -4.248983 | -1.630061 | -0.762718 |
| H | -1.447265 | -0.048489 | 0.447266  |
| H | 3.196754  | 1.224557  | 0.891414  |
| H | 2.776805  | -1.697679 | 0.057775  |
| H | 0.758478  | 0.602846  | 0.656969  |
| H | 5.105607  | -1.103577 | 0.148486  |
| H | 5.358471  | -0.130455 | 1.581929  |
| H | 7.442407  | 1.167072  | -0.907355 |
| H | -0.374342 | -3.078356 | -0.389495 |

### C6

E= -1143.61534148 a.u.

v= 17.5981

|   |          |           |           |
|---|----------|-----------|-----------|
| C | 4.060532 | -2.135695 | 1.080488  |
| C | 4.051316 | -2.435066 | -0.247552 |
| S | 3.868733 | -1.026047 | -1.217713 |
| C | 3.801492 | -0.001083 | 0.176482  |
| C | 3.915430 | -0.736976 | 1.322338  |
| C | 3.581109 | 1.473678  | 0.047153  |
| C | 2.134667 | 1.933162  | -0.148465 |

|   |           |           |           |
|---|-----------|-----------|-----------|
| O | 1.884351  | 3.048974  | -0.543943 |
| N | 1.166348  | 1.024545  | 0.190526  |
| C | -0.191884 | 1.312403  | 0.098071  |
| C | -3.568480 | -0.047030 | 0.617579  |
| C | -2.571723 | 0.783762  | 0.302663  |
| C | -1.162683 | 0.446049  | 0.410461  |
| C | -5.015444 | 0.319773  | 0.518950  |
| C | -5.836768 | -0.727188 | -0.195565 |
| O | -5.478830 | -1.835737 | -0.477317 |
| O | -7.077234 | -0.273707 | -0.467314 |
| H | 4.174134  | -2.878307 | 1.858023  |
| H | 4.151480  | -3.402231 | -0.715597 |
| H | 3.902346  | -0.288127 | 2.307800  |
| H | 3.936233  | 1.970548  | 0.954733  |
| H | 4.145737  | 1.901055  | -0.783117 |
| H | 1.456814  | 0.105101  | 0.494697  |
| H | -0.394127 | 2.317430  | -0.254055 |
| H | -3.347392 | -1.052390 | 0.965225  |
| H | -2.803998 | 1.783916  | -0.060055 |
| H | -0.910120 | -0.552884 | 0.758415  |
| H | -5.467289 | 0.423880  | 1.514104  |
| H | -5.160101 | 1.279687  | 0.018356  |
| H | -7.559548 | -0.993700 | -0.895825 |

**TS-C1-anti**

E= -1610.17755412 a.u.

v= 380.1379i

|   |           |           |           |
|---|-----------|-----------|-----------|
| N | -6.466036 | 0.057318  | 1.703403  |
| C | -7.639711 | 0.656594  | 1.554857  |
| C | -8.061770 | 1.162541  | 0.324614  |
| N | -7.311050 | 1.068763  | -0.766824 |
| C | -5.703034 | -0.022643 | 0.615299  |
| C | -6.128450 | 0.476850  | -0.616033 |
| C | -4.378469 | -0.733433 | 0.770501  |
| O | -4.256198 | -1.727377 | 1.452088  |
| N | -3.348236 | -0.177177 | 0.077998  |
| C | -2.037953 | -0.792873 | 0.081014  |
| C | -1.005966 | 0.266250  | -0.300244 |
| O | -1.262995 | 1.057289  | -1.176372 |
| C | -1.986598 | -1.952201 | -0.944697 |
| C | -0.632110 | -2.604299 | -1.050277 |
| C | 0.236066  | -2.274570 | -2.092729 |
| C | 1.493252  | -2.864870 | -2.183764 |
| C | 1.902994  | -3.784937 | -1.224209 |
| C | 1.051030  | -4.107581 | -0.170651 |
| C | -0.208992 | -3.522891 | -0.086985 |
| C | 0.301223  | 0.234761  | 0.449252  |
| C | 1.407591  | 1.102137  | -0.154105 |
| C | 2.758830  | 0.692088  | 0.517405  |
| C | 1.121646  | 2.603574  | 0.052608  |
| C | 1.561115  | 3.517251  | -1.101992 |
| C | 0.623483  | 3.392582  | -2.303689 |
| C | 1.625812  | 4.968051  | -0.624645 |
| C | 3.181698  | -0.692170 | 0.065758  |
| C | 3.992284  | -0.508899 | -1.048973 |
| C | 4.443164  | 0.824496  | -1.086162 |
| C | 3.919785  | 1.515180  | 0.000502  |
| H | -8.268959 | 0.737283  | 2.434976  |
| H | -9.027132 | 1.646902  | 0.223375  |
| H | -5.514432 | 0.376704  | -1.505948 |
| H | -3.464061 | 0.665996  | -0.467028 |
| H | -1.837184 | -1.184503 | 1.081652  |
| H | -2.741848 | -2.678573 | -0.635263 |
| H | -2.281995 | -1.539482 | -1.912885 |
| H | -0.081547 | -1.557415 | -2.843537 |
| H | 2.149734  | -2.606775 | -3.006677 |
| H | 2.880780  | -4.247399 | -1.292991 |
| H | 1.364202  | -4.823331 | 0.580326  |
| H | -0.878458 | -3.788280 | 0.725811  |
| H | 0.075654  | 0.556298  | 1.477263  |

|   |           |           |           |
|---|-----------|-----------|-----------|
| H | 0.595448  | -0.816217 | 0.532390  |
| H | 1.472763  | 0.883771  | -1.224452 |
| H | 2.581879  | 0.793621  | 1.589789  |
| H | 0.047786  | 2.756318  | 0.202162  |
| H | 1.608558  | 2.924911  | 0.982462  |
| H | 2.563107  | 3.216316  | -1.426469 |
| H | 0.971340  | 4.021879  | -3.126694 |
| H | 0.550045  | 2.364988  | -2.663229 |
| H | -0.387257 | 3.710433  | -2.031526 |
| H | 1.909527  | 5.639300  | -1.438549 |
| H | 2.349148  | 5.090960  | 0.186114  |
| H | 0.647734  | 5.289646  | -0.252412 |
| H | 4.323444  | -1.297411 | -1.712181 |
| H | 5.176645  | 1.214547  | -1.779471 |
| H | 2.618218  | -1.592764 | 0.266018  |
| H | 4.022854  | 2.577273  | 0.171620  |
| C | 4.791162  | -0.830898 | 1.595563  |
| C | 5.317225  | 0.704451  | 1.566894  |
| B | 4.456960  | 0.162317  | 2.638851  |
| B | 6.040096  | -0.412114 | 0.925746  |
| F | 3.723263  | 0.432306  | 3.695802  |
| F | 6.993146  | -0.756181 | 0.093524  |

**TS-C1-syn**

E= -1610.17862523 a.u.

v= 361.7815i

|   |           |           |           |
|---|-----------|-----------|-----------|
| N | -6.507294 | 0.638458  | 0.415332  |
| C | -7.617753 | 0.000790  | 0.760865  |
| C | -7.689674 | -1.392094 | 0.798436  |
| N | -6.648947 | -2.156842 | 0.488344  |
| C | -5.457016 | -0.124330 | 0.119428  |
| C | -5.530983 | -1.517549 | 0.151939  |
| C | -4.198073 | 0.595098  | -0.305570 |
| O | -4.227682 | 1.592758  | -0.995752 |
| N | -3.042212 | 0.026642  | 0.121763  |
| C | -1.768511 | 0.594071  | -0.254476 |
| C | -0.692893 | -0.467030 | -0.026692 |
| O | -0.936565 | -1.444449 | 0.639390  |
| C | -1.470936 | 1.893937  | 0.546820  |
| C | -0.450042 | 2.791269  | -0.106364 |
| C | 0.764183  | 3.080762  | 0.513611  |
| C | 1.719935  | 3.868127  | -0.123275 |
| C | 1.462602  | 4.385484  | -1.388137 |
| C | 0.242816  | 4.118912  | -2.007735 |
| C | -0.706809 | 3.328789  | -1.370987 |
| C | 0.662979  | -0.200888 | -0.639808 |
| C | 1.676366  | -1.326605 | -0.432470 |
| C | 3.098053  | -0.861077 | -0.794082 |
| C | 1.273005  | -2.552965 | -1.271386 |
| C | 2.112198  | -3.820215 | -1.071329 |
| C | 2.107966  | -4.275928 | 0.389533  |
| C | 1.574810  | -4.932501 | -1.973728 |
| C | 3.525740  | 0.594518  | -0.859637 |
| C | 4.921284  | 0.578108  | -0.921749 |
| C | 5.395902  | -0.666244 | -0.480296 |
| C | 4.315291  | -1.481775 | -0.157111 |
| H | -8.479620 | 0.609400  | 1.013587  |
| H | -8.608696 | -1.894730 | 1.080552  |
| H | -4.678164 | -2.131532 | -0.120764 |
| H | -3.026259 | -0.765474 | 0.749955  |
| H | -1.806459 | 0.849213  | -1.317750 |
| H | -2.423660 | 2.424056  | 0.613281  |
| H | -1.161079 | 1.626104  | 1.560993  |
| H | 0.976504  | 2.668983  | 1.494856  |
| H | 2.665383  | 4.063160  | 0.369844  |
| H | 2.202912  | 4.999710  | -1.887127 |
| H | 0.030263  | 4.532251  | -2.986790 |
| H | -1.663433 | 3.131903  | -1.847108 |
| H | 0.522171  | 0.019934  | -1.706126 |
| H | 1.016715  | 0.737485  | -0.202509 |

|   |          |           |           |
|---|----------|-----------|-----------|
| H | 1.632432 | -1.632549 | 0.614756  |
| H | 3.241995 | -1.139246 | -1.855666 |
| H | 0.234146 | -2.801463 | -1.033830 |
| H | 1.299859 | -2.268728 | -2.332014 |
| H | 3.144974 | -3.617053 | -1.378739 |
| H | 2.638222 | -5.225017 | 0.499829  |
| H | 2.578197 | -3.552133 | 1.059791  |
| H | 1.079207 | -4.421284 | 0.734263  |
| H | 2.180489 | -5.837331 | -1.886217 |
| H | 1.570376 | -4.627069 | -3.023082 |
| H | 0.548389 | -5.187428 | -1.692491 |
| H | 2.906864 | 1.386197  | -1.264581 |
| H | 5.539235 | 1.435350  | -1.153319 |
| H | 6.435587 | -0.914882 | -0.315425 |
| H | 4.388240 | -2.520091 | 0.132272  |
| C | 3.822039 | -0.462884 | 1.900709  |
| C | 3.418866 | 0.982579  | 1.298544  |
| B | 2.447510 | 0.077058  | 1.956971  |
| B | 4.755828 | 0.674381  | 1.855997  |
| F | 1.190353 | -0.070661 | 2.318860  |
| F | 5.991155 | 1.089398  | 2.005275  |

**TS-C2-anti**

E= -1414.86363679 a.u.

v= 404.6516i

|   |           |           |           |
|---|-----------|-----------|-----------|
| O | -3.389019 | 1.656115  | -0.580409 |
| O | -0.642717 | -2.166004 | -0.058785 |
| N | -5.851068 | 0.617309  | 0.433592  |
| N | -2.473577 | -0.307423 | 0.056670  |
| N | -6.331948 | -1.996365 | -0.448373 |
| C | 1.215335  | -0.803289 | -0.588895 |
| C | 0.289521  | 2.217009  | 0.451692  |
| C | 3.225803  | -1.918389 | -1.585352 |
| C | 1.519114  | 2.404312  | 1.079188  |
| C | 2.425360  | 3.351224  | 0.606033  |
| C | 2.101226  | 4.129292  | -0.499316 |
| C | 5.682962  | -1.642540 | -1.373021 |
| C | 0.862445  | 3.967336  | -1.117259 |
| C | -7.291146 | -1.245355 | 0.080594  |
| C | -0.208006 | -1.049530 | -0.234540 |
| C | -7.049995 | 0.056381  | 0.520116  |
| C | -1.124873 | 0.164628  | -0.146236 |
| C | -3.523639 | 0.503495  | -0.222852 |
| C | -5.125560 | -1.439153 | -0.523640 |
| C | -4.883550 | -0.138071 | -0.081553 |
| C | 4.285249  | -1.110568 | -1.173173 |
| C | 4.230049  | 0.399831  | -1.146568 |
| C | -0.038420 | 3.020665  | -0.644851 |
| C | -0.687219 | 1.178685  | 0.946537  |
| C | 1.853632  | -1.779878 | -1.329857 |
| H | -2.589450 | -1.270984 | 0.340209  |
| H | 3.513986  | -2.903799 | -1.944569 |
| H | 1.764701  | 1.807446  | 1.949968  |
| H | 3.380496  | 3.473458  | 1.103701  |
| H | 2.802695  | 4.866538  | -0.871989 |
| H | 5.707165  | -2.731471 | -1.342085 |
| H | 6.064044  | -1.308862 | -2.344676 |
| H | 6.352761  | -1.256494 | -0.603431 |
| H | 0.595115  | 4.585661  | -1.966385 |
| H | -8.280697 | -1.683852 | 0.156450  |
| H | -7.847019 | 0.656022  | 0.947461  |
| H | -1.084869 | 0.675541  | -1.115231 |
| H | -4.336180 | -2.036836 | -0.969792 |
| H | 5.053078  | 0.803324  | -0.554018 |
| H | 4.356814  | 0.754480  | -2.175204 |
| H | 3.299748  | 0.828740  | -0.779668 |
| H | -1.014590 | 2.911968  | -1.109388 |
| H | -0.273592 | 0.643843  | 1.806144  |
| H | -1.600262 | 1.682953  | 1.271124  |
| H | 1.252422  | -2.661632 | -1.538887 |



|   |          |           |           |
|---|----------|-----------|-----------|
| H | 1.545525 | 0.222577  | -0.544500 |
| C | 2.425269 | -1.092377 | 1.414805  |
| C | 3.919720 | -1.487600 | 0.953083  |
| B | 3.579245 | -0.189063 | 1.578468  |
| B | 2.879874 | -2.491294 | 1.276033  |
| F | 4.042773 | 0.985894  | 1.937603  |
| F | 2.543104 | -3.751340 | 1.231617  |

**TS-C2-syn**

E= -1414.86753950 a.u.

v= 407.3574i

|   |           |           |           |
|---|-----------|-----------|-----------|
| O | 3.008081  | 1.302695  | 1.315382  |
| O | 0.646646  | -1.164829 | -2.050328 |
| N | 5.678272  | 0.773861  | 0.470401  |
| N | 2.350596  | 0.075073  | -0.466487 |
| N | 6.077099  | -1.912396 | -0.209559 |
| C | -1.323449 | -0.487974 | -0.911299 |
| C | -0.539768 | 2.557422  | -0.524852 |
| C | -3.483489 | -1.644771 | -1.362733 |
| C | -1.462202 | 2.899450  | -1.513006 |
| C | -2.702844 | 3.433130  | -1.173691 |
| C | -3.038942 | 3.622861  | 0.162514  |
| C | -5.565333 | -1.979738 | -0.050820 |
| C | -2.127611 | 3.277673  | 1.157606  |
| C | 7.092553  | -1.082700 | 0.001020  |
| C | 0.129951  | -0.466326 | -1.205502 |
| C | 6.892440  | 0.255401  | 0.340559  |
| C | 0.972289  | 0.494823  | -0.375376 |
| C | 3.271166  | 0.522484  | 0.424553  |
| C | 4.858354  | -1.390656 | -0.089661 |
| C | 4.657803  | -0.050646 | 0.244748  |
| C | -4.290606 | -1.216591 | -0.310985 |
| C | -4.351726 | 0.214373  | 0.167963  |
| C | -0.885810 | 2.753928  | 0.815227  |
| C | 0.799114  | 1.955909  | -0.870128 |
| C | -2.162687 | -1.279707 | -1.667712 |
| H | 2.596694  | -0.517976 | -1.247853 |
| H | -3.836396 | -2.531209 | -1.886142 |
| H | -1.208408 | 2.744536  | -2.556683 |
| H | -3.405999 | 3.698221  | -1.954755 |
| H | -4.004758 | 4.036205  | 0.428707  |
| H | -5.472953 | -3.027673 | -0.335374 |
| H | -5.832163 | -1.927465 | 1.005710  |
| H | -6.383842 | -1.530041 | -0.624116 |
| H | -2.381017 | 3.420019  | 2.201543  |
| H | 8.093845  | -1.488799 | -0.097477 |
| H | 7.734083  | 0.918097  | 0.513571  |
| H | 0.656267  | 0.438439  | 0.671026  |
| H | 4.019774  | -2.063346 | -0.241556 |
| H | -5.125933 | 0.716198  | -0.424466 |
| H | -4.656208 | 0.270873  | 1.214296  |
| H | -3.440241 | 0.789020  | 0.028899  |
| H | -0.170094 | 2.500532  | 1.592339  |
| H | 0.971135  | 1.984735  | -1.949615 |
| H | 1.592043  | 2.530147  | -0.385197 |
| H | -1.667477 | -1.868581 | -2.436109 |
| H | -1.671216 | 0.309170  | -0.277708 |
| C | -1.390757 | -1.659519 | 1.075975  |
| C | -2.945159 | -2.021650 | 1.291636  |
| B | -1.956689 | -2.994740 | 0.785406  |
| B | -2.272875 | -0.891489 | 1.971797  |
| F | -1.766435 | -4.161382 | 0.229947  |
| F | -2.417856 | 0.175636  | 2.718697  |

**TS-C3-anti**

E= -1452.97516534 a.u.

v= 396.1372i

|   |           |           |           |
|---|-----------|-----------|-----------|
| O | -2.976841 | 1.104106  | -1.166197 |
| O | -0.813055 | -1.480474 | 2.158208  |
| N | -5.230081 | -0.592245 | -1.500446 |
| N | -2.452186 | -0.139887 | 0.646373  |

|   |           |           |           |
|---|-----------|-----------|-----------|
| N | -6.531268 | -1.190690 | 0.904676  |
| C | 1.218574  | -0.336916 | 1.682243  |
| C | -0.007582 | 2.692809  | 0.608982  |
| C | 2.188790  | 0.304593  | -0.628469 |
| C | 1.056538  | 3.217378  | 1.339247  |
| C | 2.046234  | 3.971336  | 0.711792  |
| C | 1.971665  | 4.215338  | -0.654793 |
| C | 0.897435  | 3.714542  | -1.388163 |
| C | -7.090684 | -1.431363 | -0.275472 |
| C | -0.280025 | -0.564293 | 1.579144  |
| C | -6.441293 | -1.131196 | -1.473537 |
| C | -1.105062 | 0.379520  | 0.707938  |
| C | -3.289508 | 0.270269  | -0.341686 |
| C | -5.311577 | -0.658971 | 0.878658  |
| C | -4.659053 | -0.365248 | -0.319236 |
| C | -0.085638 | 2.958708  | -0.761760 |
| C | -1.073739 | 1.839324  | 1.250056  |
| C | 1.905844  | -0.630620 | 0.373538  |
| C | 2.612799  | -0.358756 | -1.786730 |
| C | 2.610364  | -1.742393 | -1.579266 |
| C | 2.804627  | -2.789450 | -2.632376 |
| C | 1.760989  | -1.953070 | -0.347226 |
| H | -2.649352 | -0.959010 | 1.207208  |
| H | 1.427104  | 0.698339  | 1.961890  |
| H | 1.583134  | -0.999344 | 2.467492  |
| H | 2.208343  | 1.377808  | -0.480011 |
| H | 1.115787  | 3.036374  | 2.408322  |
| H | 2.873209  | 4.364825  | 1.290895  |
| H | 2.742173  | 4.797930  | -1.145588 |
| H | 0.826502  | 3.914090  | -2.451046 |
| H | -8.083080 | -1.869891 | -0.274566 |
| H | -6.916133 | -1.329244 | -2.428934 |
| H | -0.678696 | 0.388692  | -0.302369 |
| H | -4.850458 | -0.441299 | 1.836991  |
| H | -0.926039 | 2.563909  | -1.326553 |
| H | -0.969298 | 1.834655  | 2.339107  |
| H | -2.050909 | 2.267391  | 1.018348  |
| H | 3.007990  | 0.126174  | -2.670808 |
| H | 3.555261  | -2.465780 | -3.354261 |
| H | 3.134924  | -3.731041 | -2.192570 |
| H | 1.867360  | -2.969111 | -3.168430 |
| H | 1.931515  | -2.861501 | 0.231264  |
| H | 0.722313  | -1.997120 | -0.709863 |
| C | 4.488719  | -1.814397 | -0.391959 |
| C | 3.981284  | -1.052643 | 0.949792  |
| B | 4.134091  | -2.521952 | 0.855272  |
| B | 4.866562  | -0.426091 | -0.057086 |
| F | 3.899997  | -3.683354 | 1.425563  |
| F | 5.404538  | 0.689695  | -0.485792 |

**TS-C3-syn**

E= -1452.97812157 a.u.

v= 390.9088i

|   |           |           |           |
|---|-----------|-----------|-----------|
| O | 2.322693  | 1.714424  | 1.539012  |
| O | -0.239532 | 0.058198  | -2.191863 |
| N | 4.952458  | 1.250467  | 0.606520  |
| N | 1.589271  | 0.797471  | -0.393318 |
| N | 5.290019  | -1.251453 | -0.602862 |
| C | -2.132878 | 0.327887  | -0.780933 |
| C | -1.223852 | 3.355194  | -0.223590 |
| C | -3.350350 | -1.566449 | 0.473773  |
| C | -2.116977 | 3.639393  | -1.256078 |
| C | -3.411368 | 4.069561  | -0.976959 |
| C | -3.825946 | 4.220521  | 0.341880  |
| C | -2.936750 | 3.951439  | 1.379992  |
| C | 6.323884  | -0.501354 | -0.239524 |
| C | -0.673291 | 0.515066  | -1.160491 |
| C | 6.154238  | 0.745192  | 0.363429  |
| C | 0.239245  | 1.279351  | -0.213209 |
| C | 2.543761  | 1.073759  | 0.533514  |

|   |           |           |           |
|---|-----------|-----------|-----------|
| C | 4.082100  | -0.741258 | -0.368423 |
| C | 3.912787  | 0.507918  | 0.230814  |
| C | -1.644521 | 3.524135  | 1.098009  |
| C | 0.146781  | 2.800360  | -0.507365 |
| C | -2.372690 | -1.111417 | -0.414071 |
| C | -3.412532 | -2.965206 | 0.433581  |
| C | -2.471822 | -3.463719 | -0.477246 |
| C | -2.389546 | -4.879274 | -0.962521 |
| C | -2.088575 | -2.276356 | -1.332045 |
| H | 1.805537  | 0.344155  | -1.271439 |
| H | -2.416128 | 0.974599  | 0.050701  |
| H | -2.737244 | 0.599156  | -1.653507 |
| H | -3.884960 | -0.935098 | 1.172642  |
| H | -1.796927 | 3.517222  | -2.286506 |
| H | -4.094362 | 4.288112  | -1.789582 |
| H | -4.832813 | 4.555240  | 0.561108  |
| H | -3.249878 | 4.079483  | 2.409563  |
| H | 7.315989  | -0.898474 | -0.426963 |
| H | 7.011088  | 1.342826  | 0.656550  |
| H | -0.067101 | 1.092627  | 0.819443  |
| H | 3.229829  | -1.352897 | -0.645931 |
| H | -0.949275 | 3.315260  | 1.905891  |
| H | 0.424884  | 2.964338  | -1.551956 |
| H | 0.894152  | 3.280580  | 0.127671  |
| H | -4.005702 | -3.580571 | 1.098968  |
| H | -2.581666 | -5.573992 | -0.144107 |
| H | -3.132125 | -5.057991 | -1.746270 |
| H | -1.401571 | -5.095316 | -1.370395 |
| H | -2.846321 | -2.220988 | -2.126995 |
| H | -1.118219 | -2.298665 | -1.826475 |
| C | -0.603593 | -1.620817 | 0.879818  |
| C | -0.725590 | -3.237715 | 0.808231  |
| B | 0.264784  | -2.462017 | 0.029932  |
| B | -1.106630 | -2.446125 | 1.998325  |
| F | 1.173675  | -2.484966 | -0.922890 |
| F | -1.727074 | -2.451982 | 3.152138  |

**TS-C4-anti**

E= -2047.73612601 a.u.

v= 408.6393i

|    |           |           |           |
|----|-----------|-----------|-----------|
| O  | -2.691549 | -2.045592 | 1.177777  |
| Cl | -7.632738 | -1.184120 | -0.388515 |
| N  | 2.143312  | -1.410624 | -0.306435 |
| O  | 0.865929  | 0.337080  | -0.984761 |
| Cl | -2.465597 | 2.239227  | 0.383880  |
| N  | -1.405796 | -0.630781 | -0.000274 |
| C  | -6.176811 | -0.253003 | -0.188073 |
| C  | -3.801847 | -0.172421 | 0.238663  |
| C  | -5.065027 | 1.863400  | -0.129929 |
| C  | -4.985714 | -0.898817 | 0.089264  |
| C  | -0.220803 | -1.402913 | 0.258513  |
| C  | -6.228160 | 1.130528  | -0.303155 |
| C  | -3.860679 | 1.218784  | 0.135005  |
| C  | 0.958588  | -0.722231 | -0.409720 |
| C  | -2.584099 | -1.017580 | 0.534242  |
| C  | 4.528585  | -1.538911 | -0.684198 |
| C  | 3.341497  | -0.854794 | -0.727852 |
| C  | 5.786699  | -0.974041 | -1.006042 |
| C  | 7.014471  | -1.749527 | -0.597682 |
| C  | 3.960367  | 0.911008  | 0.900660  |
| C  | 5.437559  | 1.330853  | 0.377491  |
| B  | 4.205033  | 2.127548  | 0.122195  |
| F  | 3.704565  | 3.126715  | -0.561142 |
| B  | 5.193241  | 0.417006  | 1.522492  |
| F  | 5.730495  | -0.444647 | 2.354081  |
| H  | 2.168211  | -2.254419 | 0.248795  |
| H  | -1.287672 | 0.233696  | -0.512089 |
| H  | -5.083765 | 2.943594  | -0.193606 |
| H  | -4.948615 | -1.974541 | 0.204772  |
| H  | -0.330110 | -2.425170 | -0.119689 |

|   |           |           |           |
|---|-----------|-----------|-----------|
| H | -0.035034 | -1.480254 | 1.336300  |
| H | -7.166693 | 1.626310  | -0.514719 |
| H | 4.529476  | -2.526205 | -0.227002 |
| H | 3.195252  | 0.044107  | -1.308739 |
| H | 6.889000  | -2.813165 | -0.809556 |
| H | 7.901410  | -1.394446 | -1.121413 |
| H | 7.190600  | -1.646496 | 0.478599  |
| C | 5.921427  | 0.339578  | -1.415733 |
| H | 6.909884  | 0.731899  | -1.619422 |
| H | 5.118860  | 0.835346  | -1.949216 |

**TS-C4-syn**

E= -2047.73616084 a.u.

v= 407.9267i

|    |           |           |           |
|----|-----------|-----------|-----------|
| O  | 2.699140  | -2.198509 | -0.943043 |
| Cl | 7.352674  | -1.274762 | 1.284841  |
| N  | -2.198963 | -0.833401 | -1.033290 |
| O  | -0.903883 | 0.910899  | -0.379541 |
| Cl | 2.792443  | 2.168214  | -1.237752 |
| N  | 1.380307  | -0.450718 | -0.445751 |
| C  | 6.060251  | -0.332536 | 0.600498  |
| C  | 3.816958  | -0.213853 | -0.285800 |
| C  | 5.206497  | 1.768566  | -0.156660 |
| C  | 4.873221  | -0.951729 | 0.254227  |
| C  | 0.186542  | -1.195034 | -0.742835 |
| C  | 6.237646  | 1.030921  | 0.402188  |
| C  | 4.004896  | 1.153931  | -0.495134 |
| C  | -1.001141 | -0.252571 | -0.692843 |
| C  | 2.587789  | -1.032948 | -0.608527 |
| C  | -4.600073 | -0.691957 | -1.277796 |
| C  | -3.399156 | -0.153717 | -0.894072 |
| C  | -5.856789 | -0.077125 | -1.058767 |
| C  | -7.084170 | -0.934714 | -1.242463 |
| C  | -3.903089 | -0.009788 | 1.530760  |
| C  | -5.391790 | 0.635235  | 1.514808  |
| B  | -4.153310 | 1.403983  | 1.821538  |
| F  | -3.659931 | 2.604970  | 1.994569  |
| B  | -5.118497 | -0.813133 | 1.697695  |
| F  | -5.638271 | -2.017923 | 1.728743  |
| H  | -2.222116 | -1.826444 | -1.218146 |
| H  | 1.263843  | 0.520270  | -0.187542 |
| H  | 5.328284  | 2.828137  | -0.340111 |
| H  | 4.742122  | -2.018249 | 0.384919  |
| H  | 0.036636  | -2.007955 | -0.022203 |
| H  | 0.261369  | -1.657167 | -1.732795 |
| H  | 7.172518  | 1.505042  | 0.671631  |
| H  | -4.605458 | -1.720981 | -1.631112 |
| H  | -3.254895 | 0.898799  | -0.698554 |
| H  | -7.209700 | -1.610219 | -0.389285 |
| H  | -7.984400 | -0.327137 | -1.328520 |
| H  | -6.994854 | -1.551288 | -2.139017 |
| C  | -5.977298 | 1.153213  | -0.439814 |
| H  | -6.963844 | 1.564992  | -0.267851 |
| H  | -5.186872 | 1.890209  | -0.520563 |

**TS-C5-anti**

E= -1544.42761926 a.u.

v= 438.2390i

|   |           |           |           |
|---|-----------|-----------|-----------|
| C | 2.229691  | -2.465729 | -0.149376 |
| C | 3.152846  | -2.138602 | -1.095922 |
| S | 3.738269  | -0.532511 | -0.888270 |
| C | 2.728092  | -0.282861 | 0.497457  |
| C | 1.988038  | -1.399322 | 0.766223  |
| C | 2.640219  | 1.048646  | 1.176853  |
| C | 1.559424  | 1.985257  | 0.649560  |
| O | 1.409215  | 3.100509  | 1.111456  |
| N | 0.757199  | 1.491577  | -0.345978 |
| C | -0.289962 | 2.196702  | -0.952247 |
| C | -1.196364 | -0.780251 | -0.956798 |
| C | -1.465290 | 0.209044  | -1.902547 |
| C | -1.128727 | 1.566563  | -1.860842 |

|   |           |           |           |
|---|-----------|-----------|-----------|
| C | -1.784457 | -2.160277 | -1.137359 |
| C | -1.974994 | -2.892610 | 0.168026  |
| O | -2.966657 | -3.469298 | 0.507556  |
| O | -0.854198 | -2.871384 | 0.928573  |
| O | -0.220662 | 3.522692  | -0.932469 |
| C | -1.922795 | 1.643827  | 0.837650  |
| C | -2.201960 | 0.042612  | 0.648623  |
| B | -3.188615 | 1.115501  | 0.317648  |
| F | -4.331085 | 1.370006  | -0.269189 |
| B | -1.212494 | 0.615754  | 1.597129  |
| F | -0.194703 | 0.325083  | 2.388990  |
| H | 1.731884  | -3.423887 | -0.096823 |
| H | 3.536311  | -2.749912 | -1.898133 |
| H | 1.275234  | -1.447983 | 1.578916  |
| H | 2.406546  | 0.910848  | 2.235758  |
| H | 3.580263  | 1.602772  | 1.130437  |
| H | 0.990441  | 0.589605  | -0.741020 |
| H | -2.244682 | -0.033346 | -2.621727 |
| H | -1.680392 | 2.250477  | -2.495004 |
| H | -1.110802 | -2.771990 | -1.750491 |
| H | -2.755976 | -2.118893 | -1.628562 |
| H | -1.065175 | -3.337453 | 1.749275  |
| H | 0.291658  | 3.794073  | -0.146194 |
| H | -0.274515 | -0.795402 | -0.391097 |

**TS-C5-syn**

E= -1544.41051233 a.u.

v= 443.3564i

|   |           |           |           |
|---|-----------|-----------|-----------|
| C | 3.563174  | -0.309481 | -1.568223 |
| C | 3.806835  | 0.533671  | -0.526633 |
| S | 3.063569  | -0.012672 | 0.921678  |
| C | 2.397888  | -1.398448 | 0.132141  |
| C | 2.753930  | -1.421626 | -1.188979 |
| C | 1.537844  | -2.376467 | 0.872530  |
| C | 0.076011  | -2.453060 | 0.456629  |
| O | -0.659945 | -3.291029 | 0.944226  |
| N | -0.365109 | -1.547167 | -0.473220 |
| C | -1.664835 | -1.538807 | -1.000489 |
| C | -1.131712 | 1.703357  | -1.015574 |
| C | -1.892337 | 0.856241  | -1.821304 |
| C | -2.151481 | -0.522441 | -1.805862 |
| C | 0.321340  | 1.562897  | -0.595756 |
| C | 0.935547  | 2.836656  | -0.053225 |
| O | 2.112670  | 3.077301  | -0.071502 |
| O | 0.038336  | 3.672832  | 0.488827  |
| O | -2.311376 | -2.701435 | -1.001350 |
| C | -2.128090 | 1.259994  | 0.802047  |
| C | -2.634036 | -0.288123 | 0.963977  |
| B | -3.542810 | 0.823896  | 0.648206  |
| F | -4.741365 | 1.188001  | 0.263381  |
| B | -1.413412 | 0.216646  | 1.585088  |
| F | -0.287873 | -0.089619 | 2.212544  |
| H | 3.942539  | -0.147496 | -2.567530 |
| H | 4.351321  | 1.464372  | -0.526551 |
| H | 2.455151  | -2.213846 | -1.865449 |
| H | 1.924333  | -3.393960 | 0.769365  |
| H | 1.520862  | -2.159929 | 1.943596  |
| H | 0.316929  | -0.927597 | -0.890841 |
| H | -1.402681 | 2.745309  | -1.146799 |
| H | -2.652246 | 1.391465  | -2.386062 |
| H | -3.031856 | -0.840660 | -2.353578 |
| H | 0.955002  | 1.263546  | -1.437735 |
| H | 0.494908  | 0.833679  | 0.196607  |
| H | 0.525373  | 4.433230  | 0.834515  |
| H | -1.994680 | -3.230872 | -0.242920 |

**TS-C6-anti**

E= -1469.19091730 a.u.

v= 398.8246i

|   |           |           |           |
|---|-----------|-----------|-----------|
| C | -5.118152 | -1.319287 | -1.433431 |
| C | -5.068126 | -1.686081 | -0.123386 |

|   |           |           |           |
|---|-----------|-----------|-----------|
| S | -4.336634 | -0.471332 | 0.853172  |
| C | -4.086719 | 0.560105  | -0.515357 |
| C | -4.551239 | -0.028900 | -1.657366 |
| C | -3.379837 | 1.872536  | -0.377338 |
| C | -1.857743 | 1.798040  | -0.266956 |
| O | -1.210297 | 2.694172  | 0.218684  |
| N | -1.274557 | 0.668338  | -0.796932 |
| C | 0.083811  | 0.439454  | -0.670148 |
| C | 2.942286  | -0.252360 | -0.257820 |
| C | 2.053978  | -0.982709 | -1.024795 |
| C | 0.698070  | -0.666321 | -1.216716 |
| C | 4.363856  | -0.702548 | -0.078392 |
| C | 5.314195  | 0.033619  | -0.994346 |
| O | 5.050476  | 0.996970  | -1.656813 |
| O | 6.543315  | -0.517334 | -0.965652 |
| H | -5.546607 | -1.937593 | -2.209835 |
| H | -5.426984 | -2.596739 | 0.330633  |
| H | -4.495417 | 0.451642  | -2.626269 |
| H | -3.598683 | 2.491094  | -1.252739 |
| H | -3.716274 | 2.431814  | 0.496780  |
| H | -1.877968 | -0.089121 | -1.089233 |
| H | 2.368687  | -1.973090 | -1.345031 |
| H | 0.068339  | -1.415228 | -1.688764 |
| H | 4.705786  | -0.519372 | 0.944919  |
| H | 4.470835  | -1.776098 | -0.249333 |
| H | 7.110557  | 0.010001  | -1.544420 |
| H | 0.629159  | 1.326931  | -0.379745 |
| H | 2.798295  | 0.820287  | -0.172406 |
| C | 0.469851  | -0.130035 | 1.609124  |
| C | 2.040204  | -0.511292 | 1.671761  |
| B | 0.951271  | -1.517657 | 1.647538  |
| B | 1.492748  | 0.808430  | 2.085330  |
| F | 0.655107  | -2.785575 | 1.501639  |
| F | 1.800856  | 2.035436  | 2.419485  |

**TS-C6-syn**

E= -1469.19180185 a.u.

v= 408.5236i

|   |           |           |           |
|---|-----------|-----------|-----------|
| C | 5.302371  | -1.556351 | 0.583072  |
| C | 5.638539  | -1.307827 | -0.712536 |
| S | 4.956528  | 0.168506  | -1.276378 |
| C | 4.199243  | 0.471498  | 0.250632  |
| C | 4.474695  | -0.533620 | 1.134853  |
| C | 3.321264  | 1.665700  | 0.459835  |
| C | 1.879826  | 1.535993  | -0.029976 |
| O | 1.178866  | 2.505251  | -0.196353 |
| N | 1.426397  | 0.252505  | -0.229901 |
| C | 0.100028  | -0.003290 | -0.528503 |
| C | -2.748671 | -0.679225 | -0.967688 |
| C | -1.708271 | -1.585925 | -1.041411 |
| C | -0.354986 | -1.269479 | -0.827507 |
| C | -4.177966 | -1.108324 | -1.144117 |
| C | -5.141057 | 0.006388  | -0.817340 |
| O | -4.881546 | 1.176405  | -0.832102 |
| O | -6.371093 | -0.465429 | -0.544281 |
| H | 5.634905  | -2.428271 | 1.129027  |
| H | 6.257339  | -1.900635 | -1.368370 |
| H | 4.102148  | -0.534893 | 2.151826  |
| H | 3.256307  | 1.880878  | 1.530642  |
| H | 3.724073  | 2.561269  | -0.015662 |
| H | 2.049346  | -0.517196 | -0.024624 |
| H | -1.959864 | -2.643577 | -1.070894 |
| H | 0.347099  | -2.093943 | -0.739580 |
| H | -4.374422 | -1.379456 | -2.189583 |
| H | -4.417774 | -1.982416 | -0.536815 |
| H | -6.941300 | 0.297624  | -0.378414 |
| H | -0.446567 | 0.893260  | -0.787488 |
| H | -2.564187 | 0.362196  | -1.213111 |
| C | -1.147844 | 0.276938  | 1.496680  |
| C | -2.644524 | -0.184957 | 1.104998  |

|   |           |           |          |
|---|-----------|-----------|----------|
| B | -1.682929 | -1.048076 | 1.831194 |
| B | -2.223204 | 1.239864  | 1.209520 |
| F | -1.422278 | -2.264117 | 2.247516 |
| F | -2.554541 | 2.482744  | 0.992125 |

**P-Cl-anti**

E= -1610.23425998 a.u.

v= 7.2970

|   |           |           |           |
|---|-----------|-----------|-----------|
| N | 6.606477  | -0.339464 | 1.021099  |
| C | 7.740482  | -0.935937 | 0.679499  |
| C | 7.998747  | -1.338684 | -0.631166 |
| N | 7.123618  | -1.142043 | -1.610699 |
| C | 5.719326  | -0.156137 | 0.045407  |
| C | 5.981804  | -0.550900 | -1.267020 |
| C | 4.434152  | 0.541241  | 0.424595  |
| O | 4.398224  | 1.425588  | 1.253145  |
| N | 3.333233  | 0.118683  | -0.253827 |
| C | 2.036979  | 0.672699  | 0.063758  |
| C | 0.967190  | -0.321130 | -0.387042 |
| O | 1.266488  | -1.258208 | -1.089790 |
| C | 1.865443  | 2.065874  | -0.599719 |
| C | 0.710887  | 2.876330  | -0.065910 |
| C | -0.330988 | 3.288613  | -0.897033 |
| C | -1.410386 | 4.004319  | -0.386236 |
| C | -1.460461 | 4.315649  | 0.968227  |
| C | -0.416078 | 3.925055  | 1.802836  |
| C | 0.663523  | 3.216622  | 1.287985  |
| C | -0.450125 | -0.041875 | 0.050509  |
| C | -1.409420 | -1.219867 | -0.106374 |
| C | -2.871910 | -0.800904 | 0.174347  |
| C | -1.002264 | -2.370990 | 0.827546  |
| C | -1.807240 | -3.667617 | 0.679647  |
| C | -1.610413 | -4.296159 | -0.701001 |
| C | -1.395745 | -4.656369 | 1.771347  |
| C | -3.255370 | 0.696417  | -0.058081 |
| C | -3.209273 | 0.725856  | -1.579362 |
| C | -3.584913 | -0.476586 | -2.038470 |
| C | -3.902491 | -1.375739 | -0.849428 |
| H | 8.470653  | -1.098803 | 1.465469  |
| H | 8.933239  | -1.825172 | -0.890241 |
| H | 5.265091  | -0.367689 | -2.061471 |
| H | 3.336324  | -0.736995 | -0.794129 |
| H | 1.962755  | 0.798710  | 1.149424  |
| H | 2.799773  | 2.599142  | -0.406499 |
| H | 1.776310  | 1.931053  | -1.681584 |
| H | -0.299405 | 3.040675  | -1.954041 |
| H | -2.212895 | 4.316405  | -1.045004 |
| H | -2.302487 | 4.866450  | 1.370015  |
| H | -0.439831 | 4.179161  | 2.856165  |
| H | 1.485326  | 2.930111  | 1.938021  |
| H | -0.442984 | 0.350961  | 1.074281  |
| H | -0.780323 | 0.793388  | -0.576790 |
| H | -1.323834 | -1.557630 | -1.142259 |
| H | -3.115179 | -1.098354 | 1.202756  |
| H | 0.052488  | -2.612074 | 0.657282  |
| H | -1.084420 | -2.015751 | 1.863568  |
| H | -2.872524 | -3.443318 | 0.818663  |
| H | -2.158683 | -5.238102 | -0.780178 |
| H | -1.946459 | -3.644763 | -1.510607 |
| H | -0.549620 | -4.506676 | -0.869834 |
| H | -1.966415 | -5.585137 | 1.698875  |
| H | -1.554991 | -4.236421 | 2.767594  |
| H | -0.334303 | -4.906778 | 1.676926  |
| H | -3.028362 | 1.614261  | -2.172409 |
| H | -3.764957 | -0.740737 | -3.072973 |
| H | -2.662693 | 1.443229  | 0.465681  |
| H | -3.859577 | -2.447484 | -1.025376 |
| C | -4.775499 | 0.688970  | 0.327582  |
| C | -5.260692 | -0.853778 | -0.265714 |
| B | -5.296766 | -0.439670 | 1.188171  |

|   |           |           |           |
|---|-----------|-----------|-----------|
| B | -5.765988 | 0.467867  | -0.791048 |
| F | -5.409293 | -0.879889 | 2.420896  |
| F | -6.437467 | 1.049694  | -1.758026 |

**P-C1-syn**

E= -1610.23090651 a.u.

v= 12.5711

|   |           |           |           |
|---|-----------|-----------|-----------|
| N | -6.380877 | -0.095186 | 0.297823  |
| C | -7.362921 | -0.983610 | 0.370804  |
| C | -7.229808 | -2.276284 | -0.137100 |
| N | -6.111942 | -2.687322 | -0.724615 |
| C | -5.252755 | -0.508881 | -0.275401 |
| C | -5.122107 | -1.799981 | -0.788925 |
| C | -4.139348 | 0.506423  | -0.386024 |
| O | -4.351987 | 1.674892  | -0.632659 |
| N | -2.890479 | 0.001525  | -0.213281 |
| C | -1.727941 | 0.852361  | -0.322967 |
| C | -0.511778 | -0.049132 | -0.543323 |
| O | -0.564904 | -1.217489 | -0.242359 |
| C | -1.584413 | 1.748166  | 0.939144  |
| C | -0.578185 | 2.863010  | 0.799373  |
| C | 0.529977  | 2.952636  | 1.640607  |
| C | 1.482694  | 3.952630  | 1.463550  |
| C | 1.330891  | 4.885145  | 0.443862  |
| C | 0.210209  | 4.825829  | -0.381484 |
| C | -0.737845 | 3.825554  | -0.202174 |
| C | 0.693948  | 0.572063  | -1.204519 |
| C | 2.000032  | -0.235635 | -1.144780 |
| C | 2.657821  | -0.018008 | 0.224961  |
| C | 2.873563  | 0.265866  | -2.314381 |
| C | 4.230645  | -0.396941 | -2.579818 |
| C | 4.124990  | -1.920364 | -2.632794 |
| C | 4.799172  | 0.142585  | -3.894538 |
| C | 1.821872  | -0.290985 | 1.522091  |
| C | 2.875622  | 0.101849  | 2.548750  |
| C | 4.079902  | -0.234604 | 2.065209  |
| C | 3.892741  | -0.861597 | 0.687569  |
| H | -8.285652 | -0.663598 | 0.843728  |
| H | -8.045719 | -2.988190 | -0.068977 |
| H | -4.208858 | -2.118988 | -1.282160 |
| H | -2.728535 | -0.955035 | 0.072727  |
| H | -1.855037 | 1.504739  | -1.192546 |
| H | -2.577449 | 2.173008  | 1.107103  |
| H | -1.346373 | 1.112605  | 1.797415  |
| H | 0.653242  | 2.236006  | 2.445304  |
| H | 2.341572  | 3.999317  | 2.123102  |
| H | 2.072216  | 5.662311  | 0.300802  |
| H | 0.072314  | 5.564392  | -1.162587 |
| H | -1.617099 | 3.792516  | -0.839120 |
| H | 0.386589  | 0.710985  | -2.250396 |
| H | 0.848910  | 1.584540  | -0.817307 |
| H | 1.750730  | -1.283783 | -1.333125 |
| H | 2.953441  | 1.037781  | 0.261202  |
| H | 2.279388  | 0.146646  | -3.230066 |
| H | 3.025270  | 1.346501  | -2.190593 |
| H | 4.929721  | -0.111802 | -1.788488 |
| H | 5.081811  | -2.365571 | -2.916378 |
| H | 3.827628  | -2.352770 | -1.675586 |
| H | 3.382352  | -2.222196 | -3.379409 |
| H | 5.799742  | -0.254917 | -4.079498 |
| H | 4.863306  | 1.233720  | -3.883309 |
| H | 4.162152  | -0.149297 | -4.735449 |
| H | 0.864809  | 0.215966  | 1.596468  |
| H | 2.660538  | 0.465477  | 3.546086  |
| H | 5.023480  | -0.190117 | 2.594132  |
| H | 4.768394  | -0.862571 | 0.048445  |
| C | 3.276840  | -2.277793 | 0.958498  |
| C | 1.747135  | -1.853751 | 1.593806  |
| B | 1.946913  | -2.735200 | 0.382270  |
| B | 2.843249  | -2.523754 | 2.382914  |



|   |          |           |           |
|---|----------|-----------|-----------|
| F | 1.389744 | -3.435570 | -0.578457 |
| F | 3.243458 | -2.884935 | 3.583261  |

**P-C2-anti**

E= -1414.96188828 a.u.

$\nu$ = 11.5977

|   |           |           |           |
|---|-----------|-----------|-----------|
| O | 2.898075  | 1.076933  | 1.586311  |
| O | 0.370389  | -0.370494 | -2.246781 |
| N | 5.535197  | 0.539497  | 0.620504  |
| N | 2.176993  | 0.283380  | -0.406356 |
| N | 5.734567  | -2.006604 | -0.528372 |
| C | -1.555376 | -0.073952 | -0.840917 |
| C | -0.565848 | 2.926487  | -0.260874 |
| C | -3.052963 | -2.064059 | -1.495932 |
| C | -1.294796 | 3.480350  | -1.312687 |
| C | -2.591881 | 3.944689  | -1.111315 |
| C | -3.175970 | 3.855281  | 0.147549  |
| C | -3.116421 | -4.142564 | -0.136158 |
| C | -2.450203 | 3.318793  | 1.208197  |
| C | 6.808252  | -1.304150 | -0.184888 |
| C | -0.078218 | 0.065267  | -1.215578 |
| C | 6.707483  | -0.035718 | 0.387458  |
| C | 0.838286  | 0.803818  | -0.239716 |
| C | 3.116634  | 0.475088  | 0.557275  |
| C | 4.557710  | -1.425936 | -0.305180 |
| C | 4.457217  | -0.155653 | 0.263714  |
| C | -3.487725 | -2.652683 | -0.158935 |
| C | -5.009946 | -2.495144 | -0.025703 |
| C | -1.152886 | 2.863658  | 1.005830  |
| C | 0.799624  | 2.333405  | -0.490292 |
| C | -2.265540 | -1.025066 | -1.785908 |
| H | 2.411546  | -0.107099 | -1.309027 |
| H | -3.473426 | -2.602927 | -2.344257 |
| H | -0.847324 | 3.538327  | -2.299866 |
| H | -3.146100 | 4.371587  | -1.939102 |
| H | -4.188557 | 4.207043  | 0.304533  |
| H | -2.037982 | -4.278720 | -0.244411 |
| H | -3.429605 | -4.593266 | 0.808651  |
| H | -3.614916 | -4.672984 | -0.951963 |
| H | -2.898103 | 3.250262  | 2.192412  |
| H | 7.777230  | -1.759015 | -0.362430 |
| H | 7.596041  | 0.522166  | 0.664272  |
| H | 0.522906  | 0.612407  | 0.788256  |
| H | 3.670149  | -1.995282 | -0.563709 |
| H | -5.522301 | -3.006684 | -0.844862 |
| H | -5.352081 | -2.927445 | 0.917843  |
| H | -5.297295 | -1.441191 | -0.047409 |
| H | -0.589094 | 2.448873  | 1.836353  |
| H | 1.135493  | 2.522239  | -1.513548 |
| H | 1.530532  | 2.769151  | 0.195699  |
| H | -2.091490 | -0.805352 | -2.834201 |
| H | -1.994237 | 0.923810  | -0.971354 |
| C | -1.734524 | -0.524905 | 0.590617  |
| C | -2.767343 | -1.907349 | 0.946010  |
| B | -1.286484 | -1.837978 | 1.168352  |
| B | -2.994098 | -0.494420 | 1.403646  |
| F | -0.209241 | -2.562892 | 1.397222  |
| F | -3.895967 | 0.314306  | 1.923450  |

**P-C2-syn**

E= -1414.95635008 a.u.

$\nu$ = 14.8992

|   |           |           |           |
|---|-----------|-----------|-----------|
| O | -1.699372 | -1.895485 | 1.947643  |
| O | 1.899124  | -0.476162 | 1.750922  |
| N | -4.190445 | -2.584618 | 0.710409  |
| N | -0.915741 | -1.599334 | -0.148639 |
| N | -4.904192 | -0.766126 | -1.296259 |
| C | 0.003174  | 0.820123  | 1.051516  |
| C | 2.810787  | -2.075100 | -0.674311 |
| C | 0.819594  | 3.212853  | 1.562430  |
| C | 3.779825  | -1.086447 | -0.824570 |

|   |           |           |           |
|---|-----------|-----------|-----------|
| C | 5.111063  | -1.349932 | -0.517044 |
| C | 5.484964  | -2.606719 | -0.056616 |
| C | 1.857563  | 4.624570  | -0.198713 |
| C | 4.522625  | -3.601552 | 0.092995  |
| C | -5.774486 | -1.631769 | -0.789774 |
| C | 0.894477  | -0.427060 | 1.095751  |
| C | -5.418749 | -2.534423 | 0.213756  |
| C | 0.475705  | -1.647929 | 0.262335  |
| C | -1.914616 | -1.766580 | 0.763011  |
| C | -3.668857 | -0.819116 | -0.802607 |
| C | -3.310171 | -1.731893 | 0.189341  |
| C | 0.544714  | 3.986676  | 0.278116  |
| C | -0.489715 | 5.082480  | 0.573669  |
| C | 3.194912  | -3.335546 | -0.215929 |
| C | 1.362559  | -1.796853 | -0.990515 |
| C | 0.610501  | 1.933429  | 1.882253  |
| H | -1.134040 | -1.584766 | -1.133336 |
| H | 1.264472  | 3.837898  | 2.335617  |
| H | 3.489127  | -0.104475 | -1.181538 |
| H | 5.855365  | -0.571393 | -0.636413 |
| H | 6.521263  | -2.812636 | 0.184074  |
| H | 2.614748  | 3.861051  | -0.391514 |
| H | 1.691043  | 5.189452  | -1.119146 |
| H | 2.246600  | 5.309223  | 0.559483  |
| H | 4.808163  | -4.584599 | 0.448306  |
| H | -6.784928 | -1.608223 | -1.184143 |
| H | -6.146369 | -3.228159 | 0.621986  |
| H | 0.624510  | -2.510617 | 0.918762  |
| H | -2.954331 | -0.096504 | -1.186457 |
| H | -0.114071 | 5.766474  | 1.339194  |
| H | -0.698116 | 5.659284  | -0.330782 |
| H | -1.426417 | 4.649258  | 0.932191  |
| H | 2.447437  | -4.114829 | -0.098495 |
| H | 1.279675  | -0.895386 | -1.604924 |
| H | 0.952698  | -2.630387 | -1.570999 |
| H | 0.911901  | 1.610768  | 2.873500  |
| H | -0.939046 | 0.522363  | 1.529508  |
| C | -0.257156 | 1.305875  | -0.357864 |
| C | 0.018994  | 3.012643  | -0.754949 |
| B | 0.746114  | 1.840995  | -1.340559 |
| B | -1.300621 | 2.304657  | -0.774599 |
| F | 1.806071  | 1.496298  | -2.051668 |
| F | -2.607043 | 2.484291  | -0.822762 |

**P-C3-anti**

E= -1453.02322969 a.u.

v= 11.1503

|   |           |           |           |
|---|-----------|-----------|-----------|
| O | -2.599886 | 0.739616  | -1.731964 |
| O | -0.451893 | 0.340251  | 2.535723  |
| N | -4.751773 | -1.065152 | -1.238233 |
| N | -2.094136 | 0.504137  | 0.459780  |
| N | -6.177851 | -0.426164 | 1.084909  |
| C | 1.572729  | 0.462042  | 1.292597  |
| C | 0.441152  | 3.298157  | -0.018800 |
| C | 1.760523  | -0.510627 | -1.140861 |
| C | 1.162908  | 3.958731  | 0.974276  |
| C | 2.418316  | 4.494427  | 0.701540  |
| C | 2.965737  | 4.374406  | -0.571334 |
| C | 2.245723  | 3.729492  | -1.574268 |
| C | -6.656979 | -1.266757 | 0.175017  |
| C | 0.080586  | 0.619857  | 1.487199  |
| C | -5.945708 | -1.583227 | -0.982799 |
| C | -0.779049 | 1.091212  | 0.315727  |
| C | -2.912521 | 0.378577  | -0.617739 |
| C | -4.975180 | 0.086137  | 0.834465  |
| C | -4.260714 | -0.235186 | -0.320171 |
| C | 0.990465  | 3.198710  | -1.299524 |
| C | -0.877122 | 2.637563  | 0.283711  |
| C | 1.887812  | -0.715898 | 0.365978  |
| C | 1.624814  | -1.705526 | -1.730870 |

|   |           |           |           |
|---|-----------|-----------|-----------|
| C | 1.652197  | -2.797478 | -0.666014 |
| C | 1.024072  | -4.129075 | -1.017174 |
| C | 1.014419  | -1.993720 | 0.496800  |
| H | -2.337494 | 0.133738  | 1.368612  |
| H | 2.011076  | 1.373340  | 0.876014  |
| H | 2.003499  | 0.282077  | 2.278747  |
| H | 1.906053  | 0.446735  | -1.629432 |
| H | 0.742977  | 4.044684  | 1.971675  |
| H | 2.968611  | 5.003491  | 1.484205  |
| H | 3.944649  | 4.787189  | -0.783784 |
| H | 2.661944  | 3.644355  | -2.571480 |
| H | -7.633817 | -1.699776 | 0.363616  |
| H | -6.355318 | -2.268956 | -1.717238 |
| H | -0.348403 | 0.749040  | -0.629605 |
| H | -4.579783 | 0.788769  | 1.561785  |
| H | 0.424105  | 2.701236  | -2.082516 |
| H | -1.273288 | 2.977407  | 1.244401  |
| H | -1.608508 | 2.876877  | -0.492463 |
| H | 1.625669  | -1.902423 | -2.796584 |
| H | 1.551733  | -4.595804 | -1.851527 |
| H | 1.069496  | -4.810640 | -0.164943 |
| H | -0.021861 | -3.995052 | -1.302958 |
| H | 1.087811  | -2.483351 | 1.474594  |
| H | -0.035895 | -1.777625 | 0.277672  |
| C | 3.157608  | -2.852072 | -0.184527 |
| C | 3.329639  | -1.323460 | 0.570450  |
| B | 3.447738  | -2.651267 | 1.284838  |
| B | 4.075939  | -1.756792 | -0.668642 |
| F | 3.456440  | -3.233249 | 2.461260  |
| F | 4.835821  | -1.351354 | -1.658716 |

**P-C3-syn**

E= -1453.02711275 a.u.

v= 17.3939

|   |           |           |           |
|---|-----------|-----------|-----------|
| O | -2.406813 | -1.481319 | 1.612835  |
| O | 0.146750  | -0.193369 | -2.276541 |
| N | -5.037747 | -0.990427 | 0.680486  |
| N | -1.680644 | -0.724502 | -0.390726 |
| N | -5.303334 | 1.439660  | -0.683539 |
| C | 2.025785  | -0.389013 | -0.827706 |
| C | 1.017825  | -3.401064 | -0.185754 |
| C | 3.530419  | 1.432004  | 0.257394  |
| C | 1.862823  | -3.748797 | -1.239216 |
| C | 3.149092  | -4.219681 | -0.991345 |
| C | 3.604080  | -4.347252 | 0.316708  |
| C | 2.763153  | -4.012990 | 1.375695  |
| C | -6.357948 | 0.749179  | -0.265761 |
| C | 0.578035  | -0.591024 | -1.219394 |
| C | -6.224303 | -0.460894 | 0.415248  |
| C | -0.351469 | -1.263827 | -0.217327 |
| C | -2.626025 | -0.903351 | 0.569937  |
| C | -4.110837 | 0.905626  | -0.425244 |
| C | -3.978104 | -0.308917 | 0.249751  |
| C | 1.478332  | -3.545689 | 1.125014  |
| C | -0.338414 | -2.799383 | -0.440659 |
| C | 2.179743  | 1.045328  | -0.329726 |
| C | 3.655336  | 2.765026  | 0.207934  |
| C | 2.403019  | 3.363907  | -0.422487 |
| C | 2.523605  | 4.743036  | -1.035329 |
| C | 2.042790  | 2.188908  | -1.369241 |
| H | -1.908539 | -0.344426 | -1.299546 |
| H | 2.315190  | -1.087082 | -0.038935 |
| H | 2.659178  | -0.553439 | -1.702586 |
| H | 4.199997  | 0.732023  | 0.743371  |
| H | 1.511699  | -3.643859 | -2.261359 |
| H | 3.794148  | -4.487594 | -1.820057 |
| H | 4.605167  | -4.713283 | 0.511324  |
| H | 3.108339  | -4.121073 | 2.397270  |
| H | -7.338286 | 1.166778  | -0.470949 |
| H | -7.098029 | -1.009312 | 0.752185  |

|   |           |           |           |
|---|-----------|-----------|-----------|
| H | -0.015706 | -1.049910 | 0.801693  |
| H | -3.239587 | 1.471118  | -0.739293 |
| H | 0.821322  | -3.285448 | 1.949843  |
| H | -0.664695 | -2.994687 | -1.465886 |
| H | -1.080331 | -3.216558 | 0.243760  |
| H | 4.451444  | 3.354335  | 0.648399  |
| H | 3.295993  | 4.753188  | -1.808012 |
| H | 1.576030  | 5.046355  | -1.485722 |
| H | 2.787453  | 5.480573  | -0.274343 |
| H | 2.790513  | 2.080064  | -2.157936 |
| H | 1.048142  | 2.265128  | -1.820391 |
| C | 1.108091  | 1.499702  | 0.743693  |
| C | 1.272828  | 3.202625  | 0.673530  |
| B | 0.018453  | 2.449630  | 0.299292  |
| B | 1.594313  | 2.361514  | 1.884392  |
| F | -1.137032 | 2.536161  | -0.323419 |
| F | 2.170608  | 2.353285  | 3.062371  |

**P-C4-anti**

E= -2047.83290058 a.u.

v= 8.3663

|    |           |           |           |
|----|-----------|-----------|-----------|
| O  | 2.524019  | -1.826823 | 1.295160  |
| Cl | 7.519694  | -1.434214 | -0.289651 |
| N  | -2.241766 | -0.962401 | -0.339070 |
| O  | -0.818210 | 0.604933  | -1.134155 |
| Cl | 2.591533  | 2.378753  | 0.146164  |
| N  | 1.344801  | -0.439010 | -0.021172 |
| C  | 6.128644  | -0.393968 | -0.181439 |
| C  | 3.762126  | -0.120256 | 0.211079  |
| C  | 5.162680  | 1.789584  | -0.307009 |
| C  | 4.895118  | -0.933762 | 0.134222  |
| C  | 0.103336  | -1.102824 | 0.276846  |
| C  | 6.274600  | 0.968904  | -0.407613 |
| C  | 3.916011  | 1.250612  | -0.004011 |
| C  | -1.016485 | -0.390836 | -0.468073 |
| C  | 2.487395  | -0.854895 | 0.561716  |
| C  | -4.530202 | -1.341879 | -0.994682 |
| C  | -3.430566 | -0.300020 | -0.873176 |
| C  | -5.740752 | -1.401253 | -0.423298 |
| C  | -6.643317 | -2.575533 | -0.698945 |
| C  | -3.890550 | 0.858253  | -0.024795 |
| C  | -5.469118 | 0.796394  | 0.752264  |
| B  | -5.030473 | 1.793366  | -0.283988 |
| F  | -5.487232 | 2.702493  | -1.119558 |
| B  | -4.147117 | 0.809141  | 1.453872  |
| F  | -3.558350 | 0.559172  | 2.607344  |
| H  | -2.370800 | -1.710359 | 0.327673  |
| H  | 1.289944  | 0.377466  | -0.616464 |
| H  | 5.254715  | 2.857347  | -0.457534 |
| H  | 4.784466  | -1.991432 | 0.336721  |
| H  | -0.098650 | -1.078931 | 1.353624  |
| H  | 0.143337  | -2.156292 | -0.018074 |
| H  | 7.245736  | 1.381667  | -0.648217 |
| H  | -4.248638 | -2.168670 | -1.642984 |
| H  | -3.159597 | 0.050382  | -1.871986 |
| H  | -6.173004 | -3.301044 | -1.362362 |
| H  | -6.910497 | -3.079162 | 0.234616  |
| H  | -7.576561 | -2.238137 | -1.159312 |
| C  | -6.374903 | -0.383786 | 0.517324  |
| H  | -6.615090 | -0.897368 | 1.453890  |
| H  | -7.329851 | -0.073558 | 0.081383  |

**P-C4-syn**

E= -2047.83294079 a.u.

v= 7.4218

|    |           |           |           |
|----|-----------|-----------|-----------|
| O  | 2.523960  | -1.699408 | -1.526778 |
| Cl | 7.250570  | -1.717280 | 0.774972  |
| N  | -2.291107 | -0.122897 | -0.876552 |
| O  | -0.843697 | 1.241878  | 0.199399  |
| Cl | 2.877710  | 2.536899  | -0.564680 |
| N  | 1.323799  | -0.127129 | -0.459707 |

|   |           |           |           |
|---|-----------|-----------|-----------|
| C | 6.010010  | -0.551635 | 0.413463  |
| C | 3.769023  | -0.066120 | -0.342561 |
| C | 5.277031  | 1.721303  | 0.296640  |
| C | 4.784404  | -0.983040 | -0.060333 |
| C | 0.072972  | -0.678292 | -0.909461 |
| C | 6.267477  | 0.800794  | 0.599447  |
| C | 4.036913  | 1.292728  | -0.166850 |
| C | -1.050978 | 0.246171  | -0.464079 |
| C | 2.486641  | -0.688730 | -0.847736 |
| C | -4.619082 | 0.282912  | -1.353091 |
| C | -3.476087 | 0.587611  | -0.399049 |
| C | -5.805052 | -0.300725 | -1.133373 |
| C | -6.763203 | -0.506148 | -2.277623 |
| C | -3.853670 | 0.219710  | 1.013436  |
| C | -5.398262 | -0.565276 | 1.326282  |
| B | -4.966881 | 0.778686  | 1.843822  |
| F | -5.423990 | 1.880414  | 2.401023  |
| B | -4.047493 | -1.176955 | 1.529381  |
| F | -3.419060 | -2.324857 | 1.694970  |
| H | -2.418724 | -1.022704 | -1.317697 |
| H | 1.272923  | 0.721162  | 0.089733  |
| H | 5.460711  | 2.781498  | 0.412780  |
| H | 4.590804  | -2.034519 | -0.230216 |
| H | -0.087929 | -1.678999 | -0.492506 |
| H | 0.069192  | -0.780998 | -1.999109 |
| H | 7.232051  | 1.127759  | 0.965602  |
| H | -4.397763 | 0.583300  | -2.374828 |
| H | -3.236210 | 1.651913  | -0.458665 |
| H | -6.349733 | -0.150327 | -3.221074 |
| H | -7.010008 | -1.566561 | -2.383329 |
| H | -7.701308 | 0.023673  | -2.087933 |
| C | -6.358239 | -0.810443 | 0.191902  |
| H | -6.577316 | -1.876793 | 0.075670  |
| H | -7.318472 | -0.315098 | 0.367401  |

**P-C5-anti**

E= -1544.51158940 a.u.

v= 4.1690

|   |           |           |           |
|---|-----------|-----------|-----------|
| C | -4.227284 | -2.516131 | -0.224190 |
| C | -4.969801 | -1.977062 | 0.782179  |
| S | -4.892888 | -0.258061 | 0.779638  |
| C | -3.844689 | -0.246722 | -0.598088 |
| C | -3.580362 | -1.520843 | -1.015301 |
| C | -3.297058 | 1.032177  | -1.149785 |
| C | -1.995653 | 1.531870  | -0.526652 |
| O | -1.581481 | 2.653884  | -0.764419 |
| N | -1.311637 | 0.667081  | 0.258965  |
| C | 0.004842  | 1.050008  | 0.783425  |
| C | 2.480668  | -1.074220 | 0.458125  |
| C | 1.455842  | -0.939598 | 1.570766  |
| C | 0.458375  | -0.065940 | 1.713406  |
| C | 3.890059  | -1.054302 | 1.071715  |
| C | 4.978993  | -1.213608 | 0.039441  |
| O | 5.997117  | -0.584593 | 0.000456  |
| O | 4.688069  | -2.183914 | -0.852230 |
| O | -0.093038 | 2.200840  | 1.576450  |
| C | 0.986346  | 1.205212  | -0.356587 |
| C | 2.286359  | 0.037914  | -0.544835 |
| B | 2.448893  | 1.514243  | -0.268976 |
| F | 3.325849  | 2.419568  | 0.097517  |
| B | 1.144529  | 0.238562  | -1.491958 |
| F | 0.479797  | -0.315671 | -2.487244 |
| H | -4.148645 | -3.579461 | -0.402855 |
| H | -5.567645 | -2.488568 | 1.520422  |
| H | -2.945243 | -1.736017 | -1.866071 |
| H | -3.081875 | 0.905686  | -2.214805 |
| H | -4.011570 | 1.853175  | -1.070513 |
| H | -1.703304 | -0.237920 | 0.477998  |
| H | 1.588622  | -1.659570 | 2.376066  |
| H | -0.149122 | -0.109859 | 2.613854  |

|   |           |           |           |
|---|-----------|-----------|-----------|
| H | 3.995517  | -1.875725 | 1.788495  |
| H | 4.075657  | -0.117411 | 1.599533  |
| H | 5.426221  | -2.234839 | -1.474436 |
| H | -0.409178 | 2.906275  | 0.993957  |
| H | 2.335135  | -2.047718 | -0.020187 |

**P-C5-syn**

E= -1544.51495704 a.u.

v= 34.9086

|   |           |           |           |
|---|-----------|-----------|-----------|
| C | -3.730558 | 0.033973  | 1.524754  |
| C | -3.518774 | 0.978366  | 0.566763  |
| S | -2.754659 | 0.315479  | -0.825509 |
| C | -2.704448 | -1.264882 | -0.118932 |
| C | -3.260719 | -1.254964 | 1.129568  |
| C | -2.006472 | -2.397685 | -0.806298 |
| C | -0.487990 | -2.425707 | -0.622469 |
| O | 0.230284  | -3.061208 | -1.373288 |
| N | 0.006980  | -1.719837 | 0.424231  |
| C | 1.458468  | -1.588390 | 0.621585  |
| C | 1.655302  | 1.559599  | 0.968589  |
| C | 1.732381  | 0.505809  | 2.064074  |
| C | 1.656236  | -0.819234 | 1.919192  |
| C | 0.215674  | 2.080020  | 0.880297  |
| C | 0.072102  | 3.196246  | -0.122361 |
| O | 0.973144  | 3.800698  | -0.630321 |
| O | -1.224574 | 3.463784  | -0.383662 |
| O | 2.058989  | -2.838987 | 0.787905  |
| H | -4.206559 | 0.241568  | 2.473114  |
| H | -3.765407 | 2.028678  | 0.588805  |
| H | -3.327797 | -2.143073 | 1.746204  |
| H | -2.388782 | -3.349371 | -0.426254 |
| H | -2.175576 | -2.394869 | -1.884329 |
| H | -0.625965 | -1.253558 | 1.058464  |
| H | 2.310759  | 2.391815  | 1.237413  |
| H | 1.836693  | 0.891977  | 3.074776  |
| H | 1.708524  | -1.464310 | 2.791213  |
| H | -0.133403 | 2.459099  | 1.846905  |
| H | -0.474534 | 1.276171  | 0.601818  |
| H | -1.243398 | 4.187441  | -1.025066 |
| H | 1.905428  | -3.327721 | -0.032675 |
| C | 2.119724  | 0.945732  | -0.337712 |
| C | 2.050659  | -0.787648 | -0.527032 |
| B | 1.289483  | 0.213762  | -1.347165 |
| B | 3.306918  | 0.027790  | -0.486893 |
| F | 0.255121  | 0.337200  | -2.155693 |
| F | 4.612817  | -0.030767 | -0.365056 |

**P-C6-anti**

E= -1469.28453496 a.u.

v= 8.6876

|   |           |           |           |
|---|-----------|-----------|-----------|
| C | -3.585043 | -2.490655 | -1.010994 |
| C | -3.245758 | -2.765341 | 0.278868  |
| S | -3.197655 | -1.340022 | 1.242445  |
| C | -3.638580 | -0.343234 | -0.102388 |
| C | -3.807975 | -1.098296 | -1.228828 |
| C | -3.722249 | 1.144912  | 0.035407  |
| C | -2.389926 | 1.899052  | -0.014387 |
| O | -2.288980 | 3.018144  | 0.441071  |
| N | -1.366502 | 1.262859  | -0.648263 |
| C | -0.036829 | 1.855196  | -0.686998 |
| C | 2.778106  | 0.172132  | -0.918199 |
| C | 1.822790  | 0.633330  | -2.006623 |
| C | 0.680088  | 1.320634  | -1.916387 |
| C | 2.896316  | -1.353059 | -0.960261 |
| C | 3.961686  | -1.853209 | -0.016852 |
| O | 4.754549  | -1.168065 | 0.564983  |
| O | 3.935722  | -3.194435 | 0.090677  |
| H | -3.682173 | -3.248329 | -1.776262 |
| H | -3.033373 | -3.724178 | 0.725818  |
| H | -4.089772 | -0.668668 | -2.182129 |
| H | -4.334224 | 1.547241  | -0.777046 |

|   |           |           |           |
|---|-----------|-----------|-----------|
| H | -4.201040 | 1.443248  | 0.969088  |
| H | -1.474036 | 0.287240  | -0.890494 |
| H | -0.188526 | 2.931286  | -0.804177 |
| H | 3.766041  | 0.591544  | -1.134393 |
| H | 2.131484  | 0.338359  | -3.007557 |
| H | 0.147474  | 1.527765  | -2.840848 |
| H | 1.946691  | -1.830321 | -0.699648 |
| H | 3.157576  | -1.705797 | -1.963676 |
| H | 4.643599  | -3.451687 | 0.696908  |
| C | 2.294049  | 0.666669  | 0.422301  |
| C | 0.785920  | 1.578330  | 0.547590  |
| B | 1.061536  | 0.237049  | 1.161087  |
| B | 2.158217  | 2.095076  | 0.861869  |
| F | 0.473676  | -0.814247 | 1.700819  |
| F | 2.845615  | 3.198479  | 1.068182  |

**P-C6-syn**

E= -1469.28480592 a.u.

v= 10.0129

|   |           |           |           |
|---|-----------|-----------|-----------|
| C | 3.228381  | -2.620877 | 0.605958  |
| C | 3.924040  | -2.523032 | -0.560913 |
| S | 4.331471  | -0.889622 | -0.921405 |
| C | 3.557760  | -0.313470 | 0.515764  |
| C | 3.018106  | -1.351594 | 1.222130  |
| C | 3.473028  | 1.148329  | 0.827185  |
| C | 2.230707  | 1.888612  | 0.320652  |
| O | 2.110943  | 3.082108  | 0.499387  |
| N | 1.298652  | 1.137608  | -0.324252 |
| C | 0.015299  | 1.707923  | -0.709605 |
| C | -2.720742 | -0.083788 | -1.035892 |
| C | -1.610015 | 0.195062  | -2.035586 |
| C | -0.499355 | 0.927717  | -1.908958 |
| C | -2.807734 | -1.590924 | -0.784921 |
| C | -3.996540 | -1.943666 | 0.073913  |
| O | -4.882115 | -1.195714 | 0.378837  |
| O | -3.963240 | -3.232929 | 0.458635  |
| H | 2.883178  | -3.559492 | 1.017101  |
| H | 4.233270  | -3.315561 | -1.224481 |
| H | 2.486624  | -1.208635 | 2.154942  |
| H | 3.479730  | 1.294156  | 1.910263  |
| H | 4.332744  | 1.696972  | 0.437205  |
| H | 1.409941  | 0.133157  | -0.344902 |
| H | -1.756070 | -0.298434 | -2.994434 |
| H | 0.172794  | 0.968097  | -2.761905 |
| H | -2.906560 | -2.145964 | -1.723927 |
| H | -1.901008 | -1.963128 | -0.298372 |
| H | -4.752478 | -3.397050 | 0.992618  |
| H | 0.216653  | 2.738703  | -1.011222 |
| H | -3.667231 | 0.237941  | -1.482243 |
| C | -1.006679 | 1.674913  | 0.400099  |
| C | -2.464496 | 0.689698  | 0.233725  |
| B | -1.365565 | 0.476881  | 1.229401  |
| B | -2.415896 | 2.184733  | 0.376836  |
| F | -0.846963 | -0.415385 | 2.055507  |
| F | -3.141221 | 3.273687  | 0.237187  |
