# Supplementary material for: Double-boron heterocyclic carbenes: a computational study of Diels–Alder reactions
Source: Royal Society of Chemistry journal article supplement (doi:10.1039/d4cp03615h), 2024-01-01
Supplement: d4cp03615h2.pdf [file d4cp03615h2.pdf]

## Supporting Information

### Double-Boron Heterocyclic Carbenes: Computational Study of Diels-Alder Reactions

Changyu Cao,<sup>a</sup> Congjie Zhang,<sup>\*a</sup> Junjing Gu<sup>b</sup> and Yirong Mo<sup>\*c</sup>

|                                                                                                                                                                                                                                                                                                                 |    |
|-----------------------------------------------------------------------------------------------------------------------------------------------------------------------------------------------------------------------------------------------------------------------------------------------------------------|----|
| <b>Fig S1</b> The energy barriers for the Diels-Alder reactions of <b>A8</b> and <b>B10</b> calculated using the M06-2X(in black), CBS-QB3(in red), and DSD-PBEP86-D3(BJ)(in blue) functionals.....                                                                                                             | 2  |
| <b>Fig S2.</b> Occupied $\pi$ orbitals of <b>Ai</b> (i=1-14).....                                                                                                                                                                                                                                               | 2  |
| <b>Fig S3</b> The distortion angle of 5-substituted cyclopentadienes' plane .....                                                                                                                                                                                                                               | 3  |
| <b>Fig S4</b> The distortion angles of the transition-state of Diels-Alder reactions of <b>Bi</b> (i=1-10).....                                                                                                                                                                                                 | 4  |
| <b>Fig S5</b> Optimized products of the Diels-Alder reactions of $C_2B_2F_2$ with <b>Bi</b> (i=1-10).....                                                                                                                                                                                                       | 5  |
| <b>Fig S6</b> Optimized geometries of <b>Ci</b> (i=1-6).....                                                                                                                                                                                                                                                    | 6  |
| <b>Fig S7</b> HOMO and LUMO of <b>Ci</b> (i=1-6).....                                                                                                                                                                                                                                                           | 7  |
| <b>Fig S8.</b> Bond lengths of transition states, energy barriers $\Delta G_{TS}$ , the energies and bond lengths are given in angstrom and kcal/mol, respectively. ....                                                                                                                                        | 8  |
| <b>Fig S9</b> Optimized products and the reaction free energy $\Delta G_{re}$ (in kcal/mol) of the Diels-Alder reactions of $C_2B_2F_2$ with <b>Ci</b> (i=1-6).....                                                                                                                                             | 9  |
| <b>Table S1.</b> Calculated bond energies of central C-C bonds (Eb, in kcal/mol), resonance energies (RE, in kcal/mol) and their relative values, as well as the weights of covalent (1) and two ionic (2 and 3) resonance structures of molecules <b>A1</b> ( $C_2B_2H_2$ ) and <b>A8</b> ( $C_2B_2F_2$ )..... | 10 |
| <b>Table S2.</b> NICS(0) and NICS(1) values of <b>Ai</b> (i=1-14) calculated at M06-2X/6-311++G** level                                                                                                                                                                                                         | 10 |
| <b>Table S3.</b> Bond length and Wiberg bond index of <b>P-Bi-anti</b> and <b>P-Bi-syn</b> .....                                                                                                                                                                                                                | 10 |

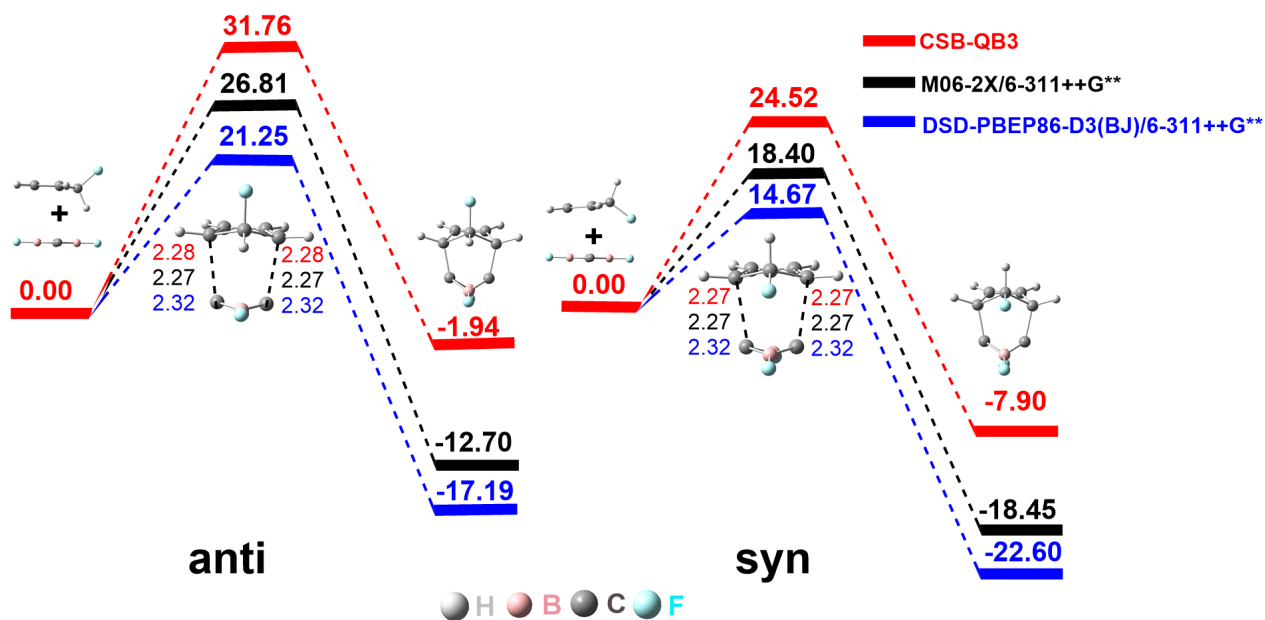

Fig S1 The energy barriers for the Diels-Alder reactions of **A8** and **B10** calculated using the M06-2X(in black), CBS-QB3(in red), and DSD-PBEP86-D3(BJ)(in blue) functionals

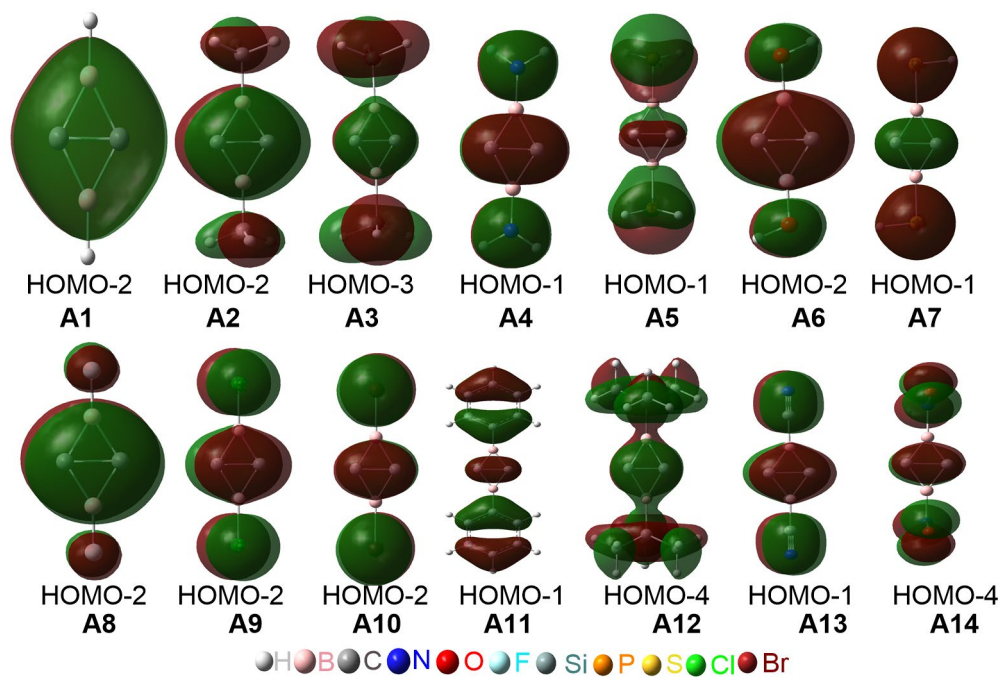

Fig S2. Occupied  $\pi$  orbitals of  $A_i$  (i=1-14).

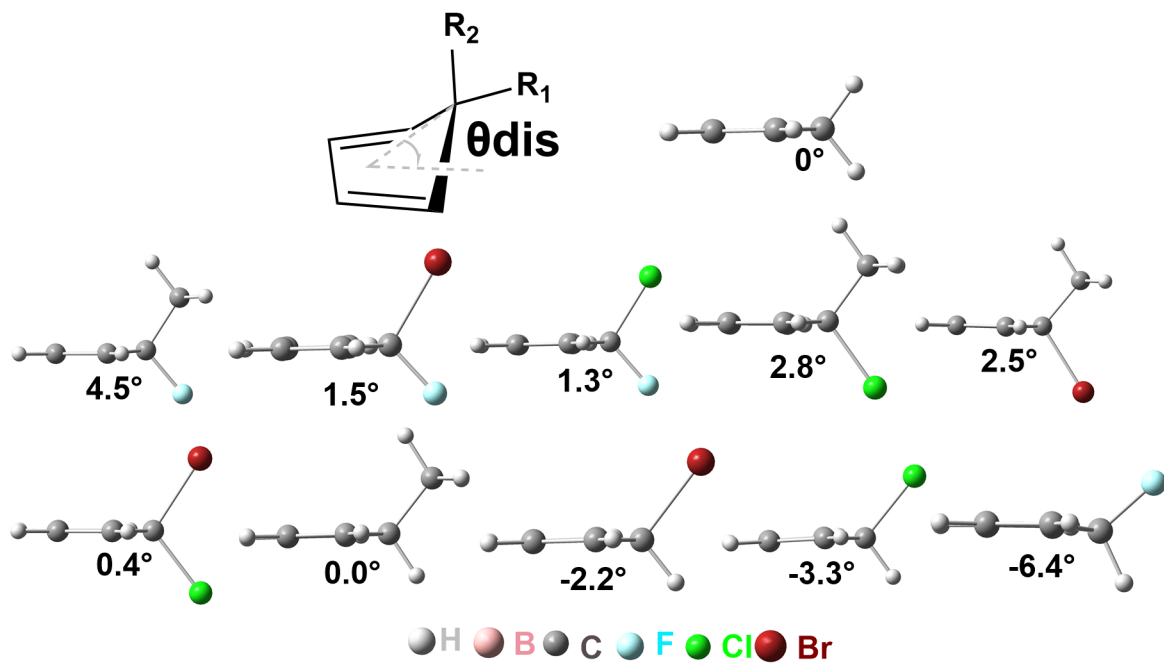

Fig S3 The distortion angle of 5-substituted cyclopentadienes' plane

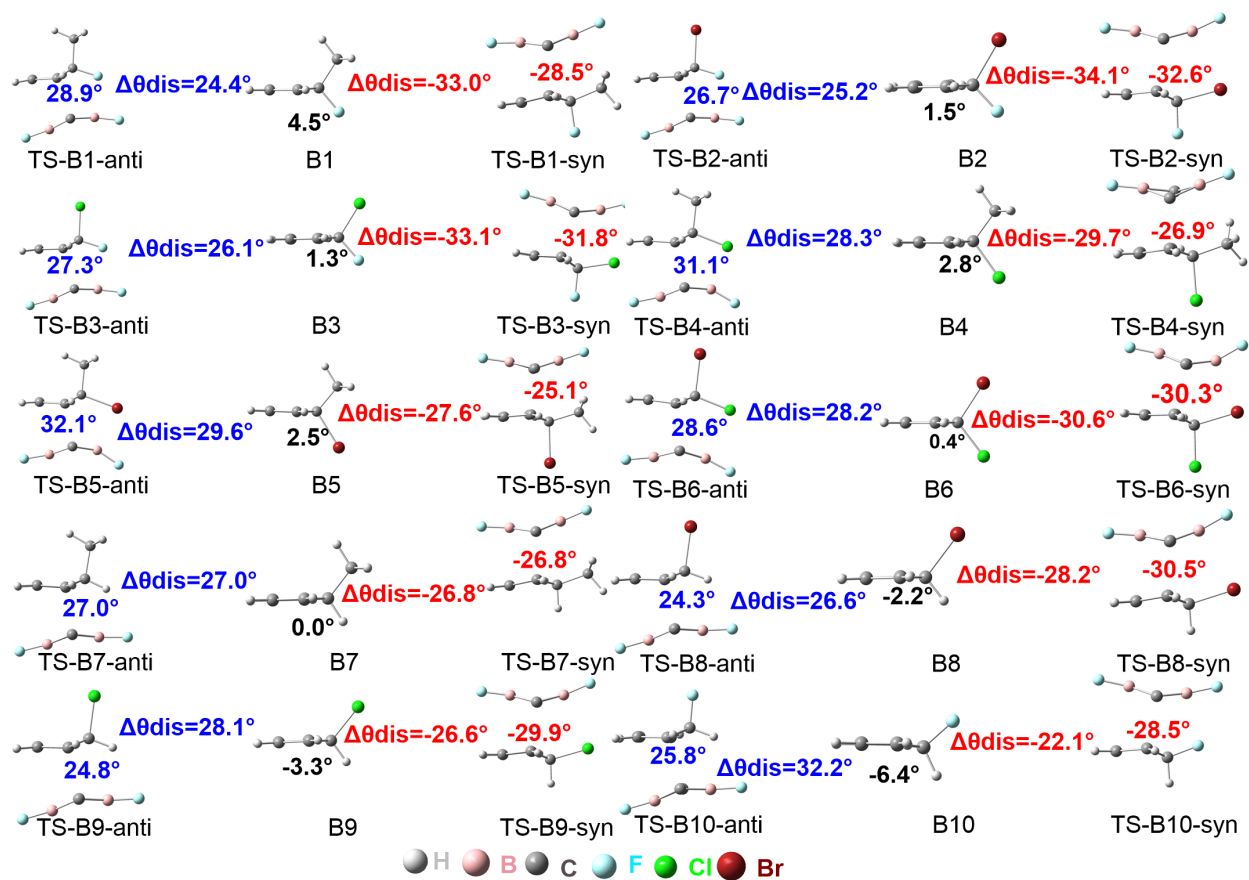

Fig S4 The distortion angles of the transition-state of Diels-Alder reactions of Bi (i=1-10).

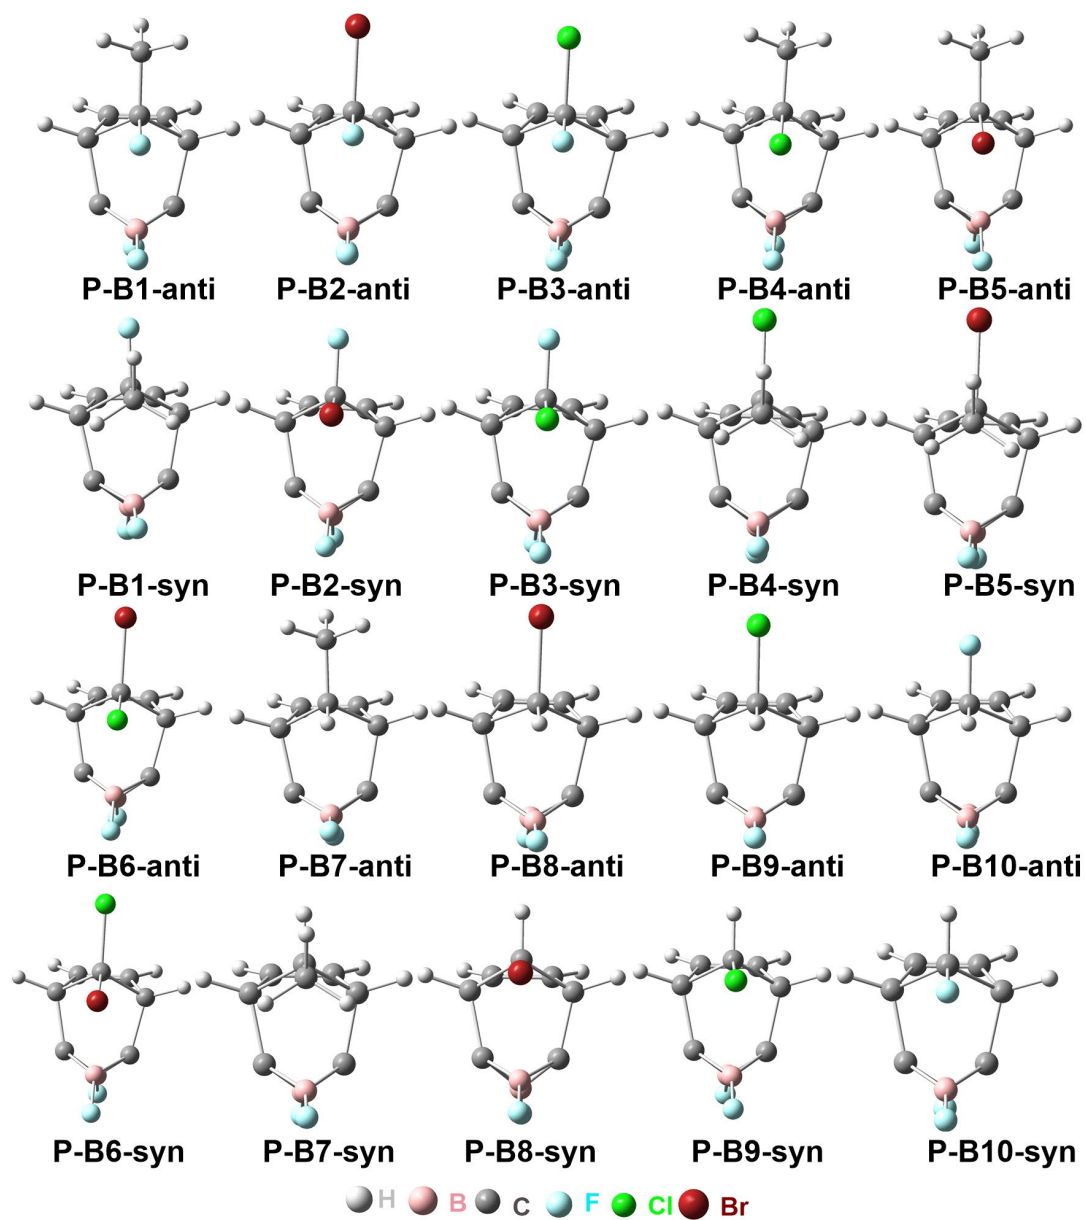

Fig S5 Optimized products of the Diels-Alder reactions of  $C_2B_2F_2$  with Bi ( $i=1-10$ )

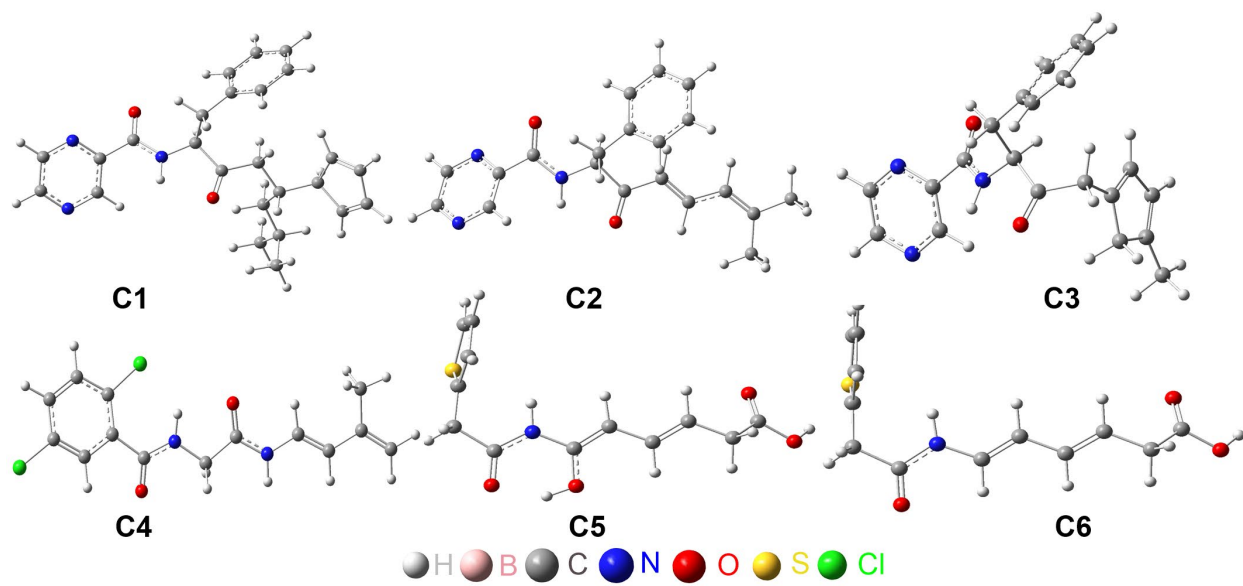

Fig S6 Optimized geometries of Ci (i=1-6).

---

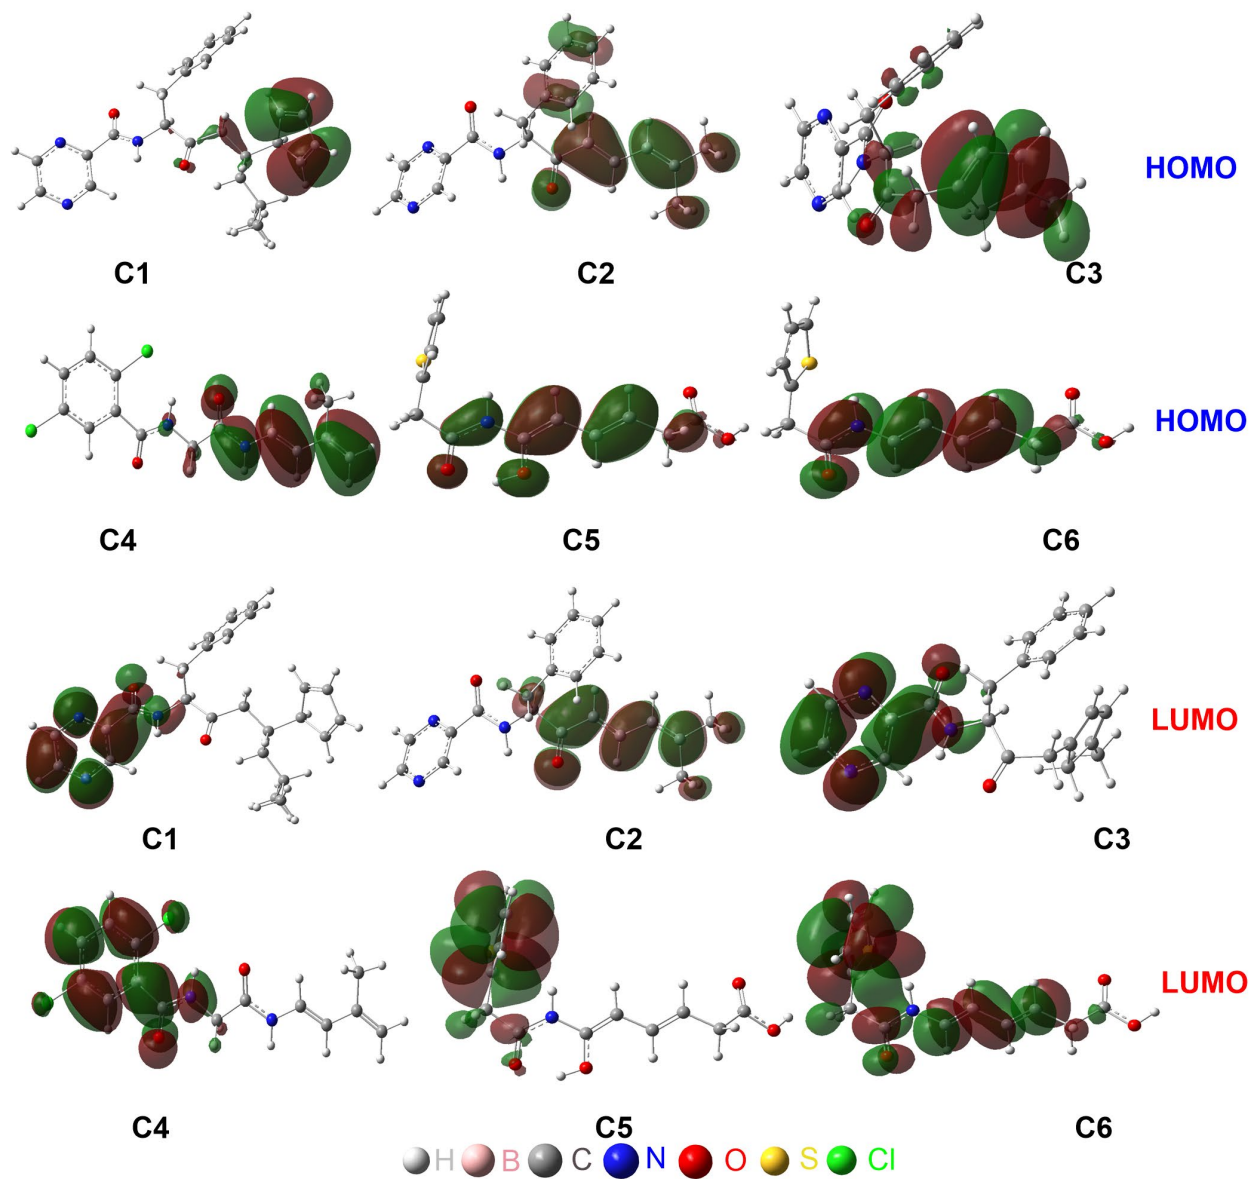

Fig S7 HOMO and LUMO of Ci (i=1-6).

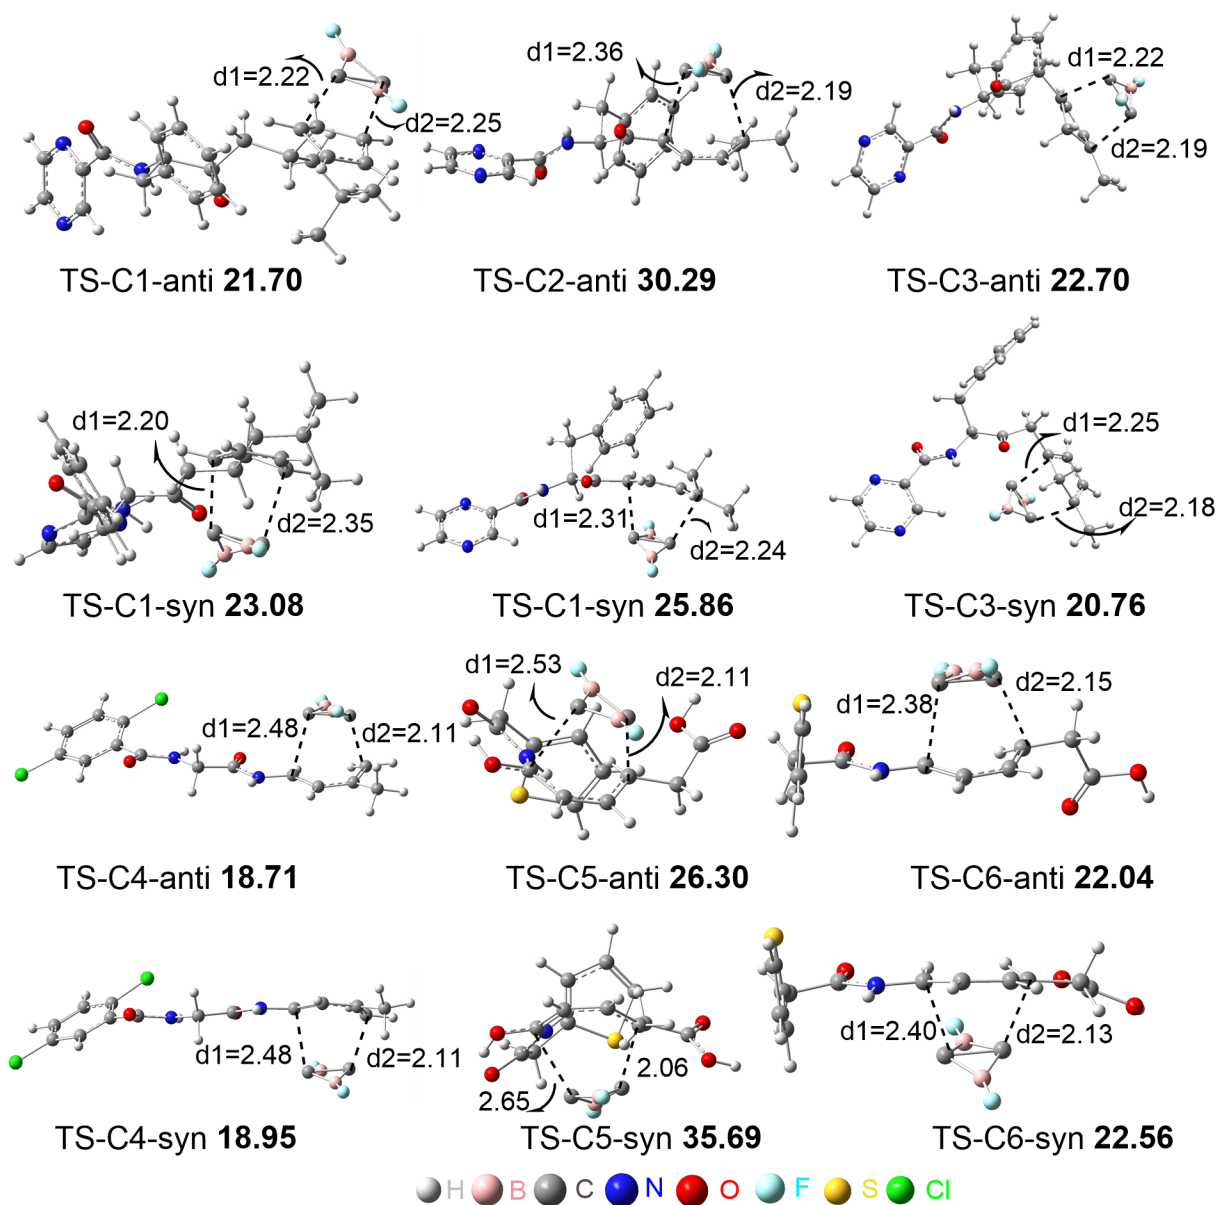

Fig S8. Bond lengths of transition states, energy barriers  $\Delta G_{TS}^{\ddagger}$ , the energies and bond lengths are given in angstrom and kcal/mol, respectively.



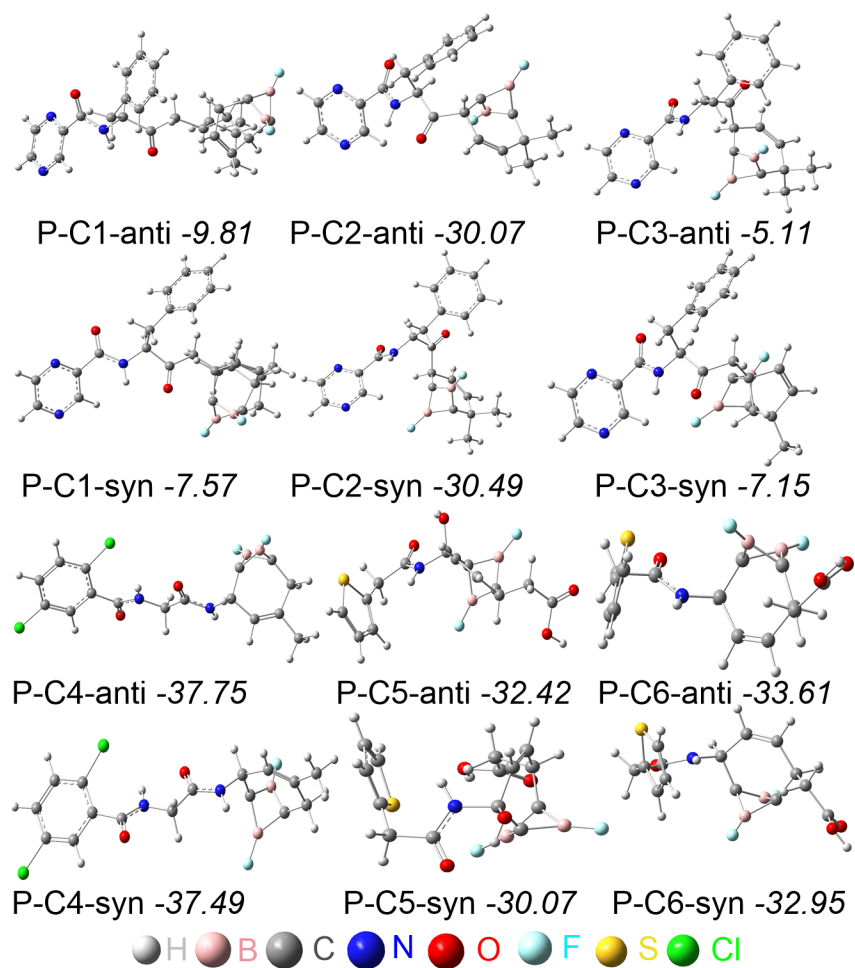

Fig S9 Optimized products and the reaction free energy  $\Delta G_{re}$  (in kcal/mol) of the Diels-Alder reactions of  $C_2B_2F_2$  with  $C_i$  ( $i=1-6$ ).

**Table S1.** Calculated bond energies of central C-C bonds (Eb, in kcal/mol), resonance energies (RE, in kcal/mol) and their relative values, as well as the weights of covalent (1) and two ionic (2 and 3) resonance structures of molecules **A1** (C<sub>2</sub>B<sub>2</sub>H<sub>2</sub>) and **A8** (C<sub>2</sub>B<sub>2</sub>F<sub>2</sub>)

| Species   | Eb    | RE   | RE% | 1    | 2    | 3    |
|-----------|-------|------|-----|------|------|------|
| <b>A1</b> | 157.5 | 63.4 | 40  | 0.59 | 0.20 | 0.20 |
| <b>A8</b> | 155.0 | 66.3 | 43  | 0.58 | 0.21 | 0.21 |

**Table S2.** NICS(0) and NICS(1) values of Ai (i=1-14) calculated at M06-2X/6-311++G\*\* level

| Species   | NICS(0) | NICS(1) | Species    | NICS(0) | NICS(1) |
|-----------|---------|---------|------------|---------|---------|
| <b>A1</b> | -14.10  | -19.89  | <b>A8</b>  | -16.18  | -17.91  |
| <b>A2</b> | -15.21  | -19.75  | <b>A9</b>  | -15.42  | -18.25  |
| <b>A3</b> | -12.81  | -19.80  | <b>A10</b> | -14.63  | -18.03  |
| <b>A4</b> | -23.90  | -18.51  | <b>A11</b> | -17.05  | -18.54  |
| <b>A5</b> | -16.92  | -19.38  | <b>A12</b> | -16.36  | -19.62  |
| <b>A6</b> | -19.34  | -18.03  | <b>A13</b> | -16.30  | -19.66  |
| <b>A7</b> | -20.30  | -18.80  | <b>A14</b> | -20.05  | -18.20  |

**Table S3.** Bond length and Wiberg bond index of P-Bi-anti and P-Bi-syn.

| Product           | d(C1-C2) | WBI(C1-C2) | d(C1-C3) | WBI(C1-C3) |
|-------------------|----------|------------|----------|------------|
| <b>P-B1-anti</b>  | 1.714    | 0.75       | 1.563    | 0.96       |
| <b>P-B1-syn</b>   | 1.724    | 0.73       | 1.558    | 0.97       |
| <b>P-B2-anti</b>  | 1.719    | 0.74       | 1.561    | 0.96       |
| <b>P-B2-syn</b>   | 1.715    | 0.75       | 1.551    | 0.97       |
| <b>P-B3-anti</b>  | 1.720    | 0.74       | 1.560    | 0.96       |
| <b>P-B3-syn</b>   | 1.716    | 0.75       | 1.553    | 0.97       |
| <b>P-B4-anti</b>  | 1.697    | 0.77       | 1.566    | 0.96       |
| <b>P-B4-syn</b>   | 1.719    | 0.74       | 1.561    | 0.96       |
| <b>P-B5-anti</b>  | 1.695    | 0.77       | 1.555    | 0.96       |
| <b>P-B5-syn</b>   | 1.719    | 0.74       | 1.563    | 0.96       |
| <b>P-B6-anti</b>  | 1.708    | 0.76       | 1.554    | 0.96       |
| <b>P-B6-syn</b>   | 1.705    | 0.77       | 1.550    | 0.96       |
| <b>P-B7-anti</b>  | 1.725    | 0.72       | 1.571    | 0.96       |
| <b>P-B7-syn</b>   | 1.716    | 0.74       | 1.570    | 0.96       |
| <b>P-B8-anti</b>  | 1.730    | 0.72       | 1.568    | 0.95       |
| <b>P-B8-syn</b>   | 1.707    | 0.75       | 1.560    | 0.96       |
| <b>P-B9-anti</b>  | 1.730    | 0.72       | 1.566    | 0.96       |
| <b>P-B9-syn</b>   | 1.709    | 0.75       | 1.561    | 0.96       |
| <b>P-B10-anti</b> | 1.733    | 0.72       | 1.563    | 0.96       |
| <b>P-B10-syn</b>  | 1.715    | 0.74       | 1.564    | 0.96       |
